1 **Title: A gut commensal niche regulates stable association of a multispecies**  
2 **microbiota**

3 **Authors:** Ren Dodge<sup>1</sup>, Eric W. Jones<sup>2,3</sup>, Haolong Zhu<sup>1,4</sup>, Benjamin Obadia<sup>5</sup>, Daniel J. Martinez<sup>1</sup>,  
4 Chenhui Wang<sup>1,6</sup>, Andrés Aranda-Díaz<sup>7</sup>, Kevin Aumiller<sup>1,4</sup>, Zhexian Liu<sup>4</sup>, Marco Voltolini<sup>8</sup>,  
5 Eoin L. Brodie<sup>8</sup>, Kerwyn Casey Huang<sup>7,9,10</sup>, Jean M. Carlson<sup>3</sup>, David A. Sivak<sup>2</sup>, Allan C.  
6 Spradling<sup>1,4,6</sup>, William B. Ludington<sup>1,4\*</sup>

7 **Affiliations:**

8 <sup>1</sup>Department of Embryology, Carnegie Institution for Science, Baltimore, MD 21218

9 <sup>2</sup>Department of Physics, Simon Fraser University, Burnaby, BC, V5A 1S6

10 <sup>3</sup>Department of Physics, University of California, Santa Barbara, CA 93106

11 <sup>4</sup>Department of Biology, Johns Hopkins University, Baltimore, MD 21218

12 <sup>5</sup>Molecular and Cell Biology Department, University of California, Berkeley, CA 94720

13 <sup>6</sup>Howard Hughes Medical Institute, Baltimore, MD 21218

14 <sup>7</sup>Department of Bioengineering, Stanford University, Stanford, CA 94305 USA

15 <sup>8</sup>Lawrence Berkeley National Lab, Berkeley, CA 94720

16 <sup>9</sup>Department of Microbiology and Immunology, Stanford University School of Medicine,  
17 Stanford, CA 94305 USA

18 <sup>10</sup>Chan Zuckerberg Biohub, San Francisco, CA 94158 USA

19 \*Corresponding author. Email: ludington@carengiescience.edu

20 **Abstract:** The intestines of animals are typically colonized by a complex, relatively stable  
21 microbiota that influences health and fitness, but the underlying mechanisms of colonization  
22 remain poorly understood. As a typical animal, the fruit fly, *Drosophila melanogaster*, is  
23 associated with a consistent set of commensal bacterial species, yet the reason for this  
24 consistency is unknown. Here, we use gnotobiotic flies, microscopy, and microbial pulse-chase  
25 protocols to show that a commensal niche exists within the proventriculus region of the  
26 *Drosophila* foregut that selectively binds bacteria with exquisite strain-level specificity. Primary  
27 colonizers saturate the niche and exclude secondary colonizers of the same strain, but initial  
28 colonization by *Lactobacillus* physically remodels the niche to favor secondary colonization by  
29 *Acetobacter*. Our results provide a mechanistic framework for understanding the establishment  
30 and stability of an intestinal microbiome.

31 **One-Sentence Summary:** A strain-specific set of bacteria inhabits a defined spatial region of  
32 the *Drosophila* gut that forms a commensal niche.  
33

34 **Main Text:**

35 Animal guts are colonized by a complex community of host-specific commensal bacteria  
36 that is relatively stable over time within an individual (1–3) and can have life-long effects on  
37 health (4, 5). It is unknown how this microbiome is established and maintained over time in the  
38 face of daily fluctuations in diet (6), invasion by pathogens (7), and disruptions by antibiotics (8).  
39 One hypothesis is that long-term maintenance of diet and lifestyle habits reinforces microbiome  
40 stability (1, 9), while an alternative, non-exclusive hypothesis is that the host constructs  
41 microbial niches in the gut that acquire and sequester symbiotic bacteria (10–14).

42 The microbiome of the fruit fly, *Drosophila melanogaster*, has been studied for over a  
43 century and is relatively simple in its composition compared to the mammalian gut (15), yet how  
44 gut microbiome assembly is regulated remains unclear. Like human colonic crypts, the fly gut is  
45 microaerobic and colonized by bacteria from the Lactobacillales class and Proteobacteria phylum  
46 (16–19). Flies can easily be reared germ-free and then associated with defined bacterial strains,  
47 providing a high level of biological control (20). Furthermore, the fly gut microbiota are of low  
48 diversity, with ~5 species of stable colonizers from two primary groups: the genera *Lactobacillus*  
49 (phylum Firmicutes), which was recently split into *Lactiplantibacillus* and *Levilactibacillus*, and  
50 *Acetobacter* (class  $\alpha$ -Proteobacteria) (19, 21). These species are easily cultured, genetically  
51 tractable (20), and they affect fly lifespan, fecundity, and development (22–28).

52 While colonization of the fly gut has long been argued to be non-specifically regulated by  
53 host filtering mechanisms, including feeding preferences, immunity, and digestion, recent  
54 evidence suggests flies may also selectively acquire *Lactobacillus* and *Acetobacter* strains in the  
55 wild (17, 29). Here, we discover an ecological niche within the *Drosophila* foregut and  
56 characterize priority effects that regulate the stable gut association of specific bacterial species.

## 57 **Results**

### 58 ***Spatially specific gut localization of Lactobacillus plantarum from wild flies***

59 To investigate whether commensal bacteria form stable associations with the fly gut in a manner  
60 consistent with the existence of a niche, we exposed flies to a quantified inoculum of bacterial  
61 cells labeled with a fluorescent protein (Fig. S1A-G). Following inoculation, flies were  
62 transferred to germ-free food daily for 3 d followed by an additional transfer to a new germ-free  
63 vial for 3 h to allow transient bacteria to clear from the gut (Methods, Fig. S1). Clearing prior to  
64 analysis reduced the total number of gut bacteria and the spatial variation in bacterial location  
65 (Fig. S1H-J). These experiments revealed that a strain of *Lactobacillus plantarum* (*Lp*) isolated  
66 from a wild-caught fly (*LpWF*) persists exclusively in the *D. melanogaster* foregut (Fig. 1A-E,  
67 S1I,J), including the proventriculus (a luminal region connecting the esophagus with the anterior  
68 midgut (30)), the crop (a sack-like appendage), and the crop duct that connects the crop to the  
69 proventriculus. Bacteria associated with longitudinal furrows lining the surface of the  
70 proventriculus inner lumen, the crop duct, and the base of the crop (Fig. 1C-E, S1J). Similar to  
71 *LpWF*, a strain of *Acetobacter indonesiensis* colonized the same foregut regions (Fig. 1F, S2),  
72 indicating that the two major groups of fly gut bacteria have the same spatial specificity in the  
73 foregut. By contrast, flies colonized with *Lp* from laboratory flies (*LpLF*) (Fig. S1K) or the  
74 *LpWCFSI* strain isolated from humans (Fig. S1L) had much lower levels of colonization. No *Lp*  
75 strains were found at substantial abundance in the midgut or other regions of the fly after  
76 clearing transient bacteria. Consistent with microscopy, live bacterial density was greatest in the  
77 proventriculus, followed by the crop, and was lowest in the midgut and hindgut (Fig. 1G, S1M).  
78 We further validated that *LpWF* maintains stable colonization in the absence of ingestion of new

79 bacterial cells over 5 d during which non-adherent bacteria were flushed from the gut by  
80 fastidiously maintaining sterility of the food using a CAFÉ feeder (17) (Fig. S3A,B).

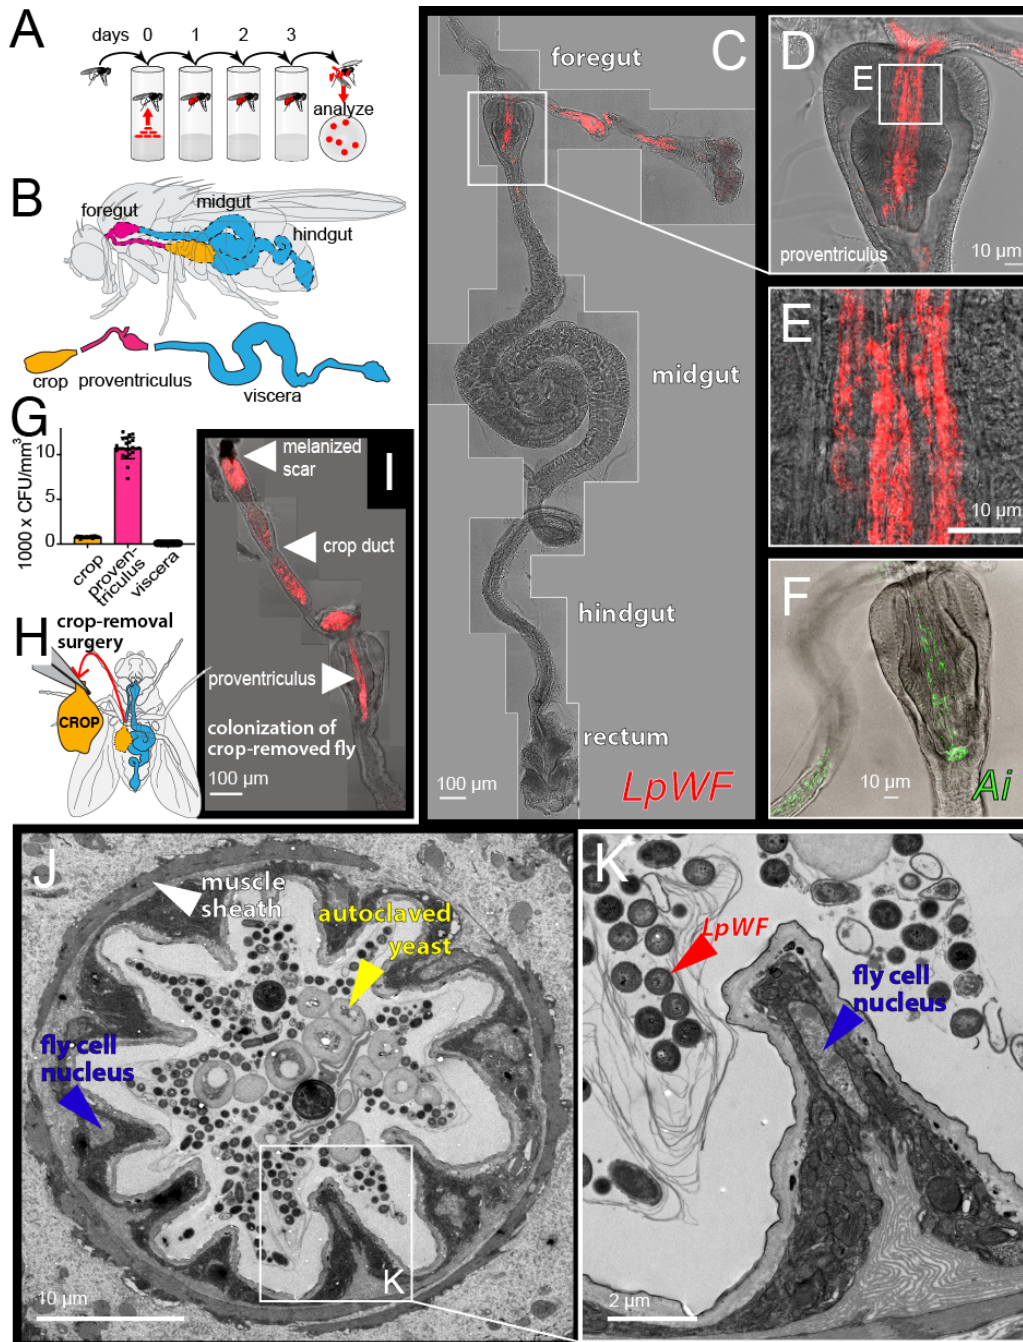

81  
82 **Fig. 1. *LpWF* stably colonizes the fly gut with spatial specificity.** (A) Colonization assay schematic.  
83 (B) Gut diagram. (C) Microscopy of *LpWF*-mCherry colonization in whole gut after clearing transient  
84 cells shows a specific colonization zone in the foregut. Max intensity z-projection. Scale bar: 100 $\mu$ m. (D)  
85 Proventriculus. (E) Anterior proventriculus inner lumen. (F) *Ai* colonization is also specific to the  
86 proventriculus lumen and crop duct. (G) CFU densities from regions dissected in B.  $n = 60$  individual



87 guts/region. **(H)** Microsurgery to remove the crop. **(I)** *LpWF* colonizes the foregut of flies with the crop  
88 removed ( $n=15/15$ ). Arrow 1: healed wound site. Arrow 2: crop duct. Arrow 3: proventriculus (c.f. panel  
89 C). **(J)** TEM cross section of proventriculus inner lumen. **(K)** Detail of J.

90  
91 A bacterial population in the foregut with the observed spatial localization might be  
92 maintained by proliferation and constant re-seeding from the crop, in which case flies without  
93 crops could not be stably colonized. We conducted microsurgery to remove the crop from germ-  
94 free flies (Fig. 1H, Methods), inoculated them with *LpWF* 5 d post-surgery, and then dissected  
95 and imaged the gut 5 d post inoculation (dpi). Surgical removal was validated and the remaining  
96 portion of the crop duct had a melanized scar at the surgery site (Fig. 1I). All cropless flies were  
97 stably colonized by *LpWF* ( $n=15/15$ ), with a high density of bacteria in the proventriculus inner  
98 lumen as in flies with an intact crop (c.f. Fig. 1C). We observed similar *Ai* colonization following  
99 cropectomy ( $n=14/14$  colonized; Fig. S2D,E). Thus, the crop is not required for stable foregut  
100 colonization by *LpWF* or *Ai*, suggesting that the ability of the bacteria to specifically bind to the  
101 proventriculus and crop duct is key to stable bacterial association. Examining these regions  
102 further, transmission electron microscopy (TEM) of the proventriculus lumen revealed a  
103 consistent tissue geometry (Fig. 1J,K), with densely packed bacterial cells longitudinally oriented  
104 in elongated furrows formed by host cell bodies making up an average of 11 ridges per cross  
105 section (Fig. S3C).

106

107 ***Commensal association saturates at a precise bacterial population size and resists***  
108 ***displacement, suggesting a niche***

109 A niche would be expected to result in strong bacterial association based on specific binding  
110 sites, such that the associated bacterial population size would saturate at a well-defined value.  
111 Moreover, cells already bound to the proventriculus would be expected to promote population  
112 stability and prevent later-arriving bacteria from colonizing. To test these hypotheses, we

113 colonized germ-free flies with a range of doses of *LpWF*-mCherry and measured the abundance  
114 over time. As predicted, over a wide range of initial inoculum sizes, the associated bacterial  
115 population saturated at  $\sim 10^4$  CFUs/fly (Fig. 2A). Furthermore, when the inoculum size was  
116 below that saturation level, the population of bacteria in the proventriculus increased gradually  
117 and plateaued within 5 d. Growth measurements in live flies (17) demonstrated that the plateau  
118 was reached by growth of the initially bound population rather than ingestion of additional cells.  
119 By contrast, when an excess of bacteria was supplied initially, the population decreased to the  
120 same plateau value within 1 d (Fig. 2A), indicating that the niche has a finite and fixed carrying  
121 capacity. Similar dynamics were observed for *Ai* with  $\sim 10^3$  cells at the saturated density (Fig.  
122 S2F).

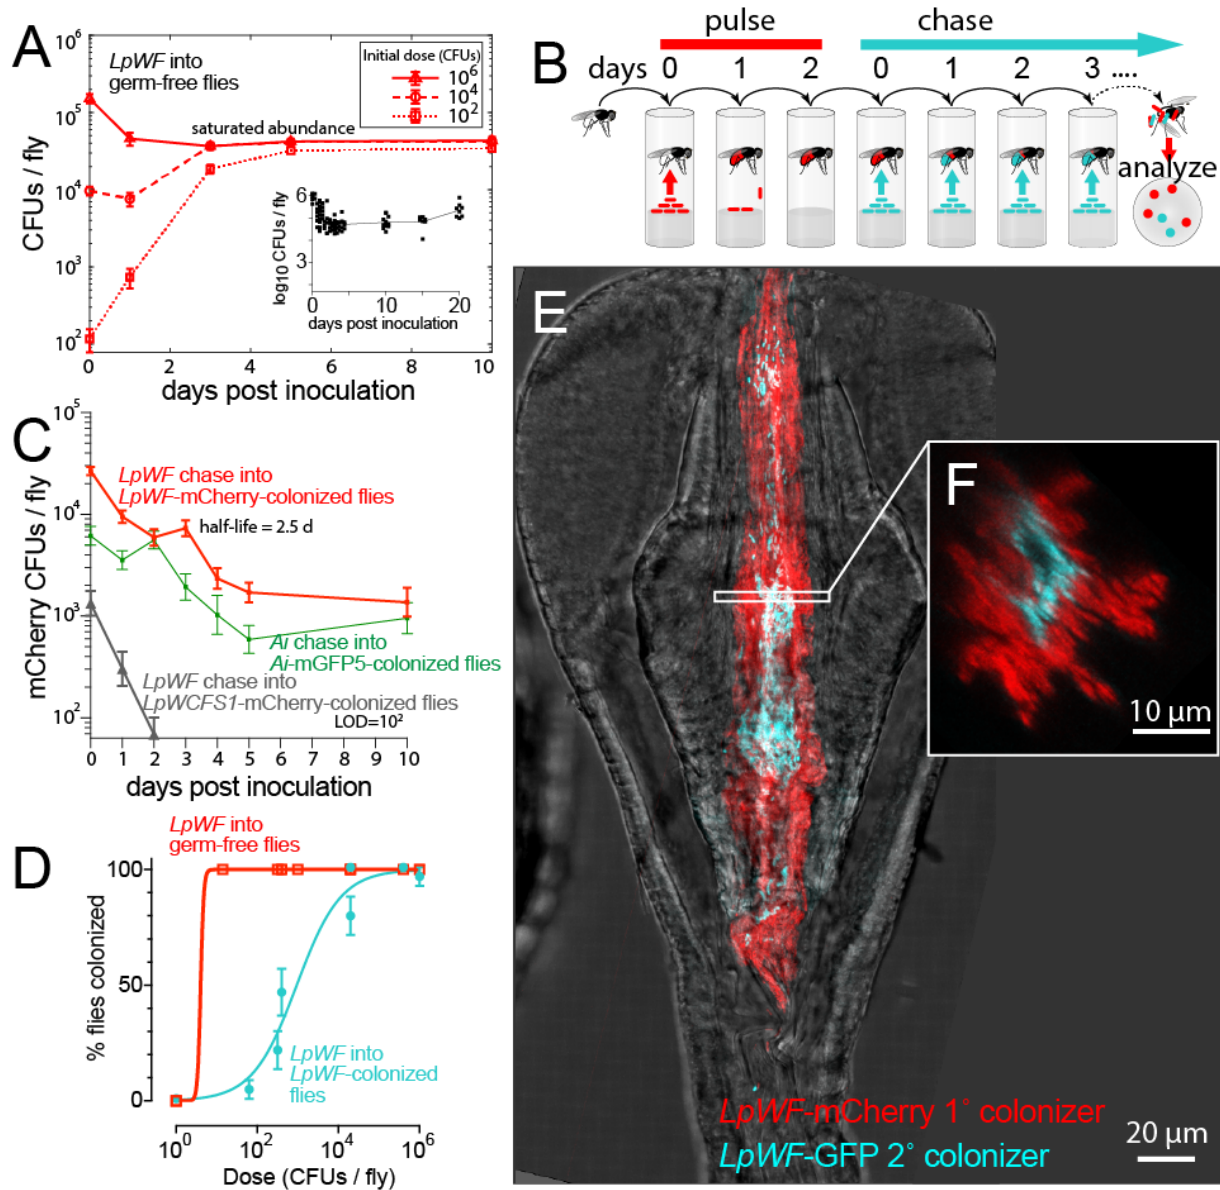

123  
 124 **Fig. 2. Kinetic properties of bacterial associations suggest the existence of a niche in the**  
 125 **proventriculus.** (A) Saturation occurs in a time course of colonization in germ-free flies inoculated with  
 126 *LpWF*. Error bars: s.e.m. Inset: 20-day time course after inoculation with 10<sup>6</sup> CFUs (data from (17)). (B)  
 127 Bacterial pulse-chase experimental design: flies were first pre-colonized with *LpWF*-mCherry, then fed an  
 128 excess of unlabeled *LpWF* (blue) daily on fresh food. (C) Bacterial cell turnover quantified by pulse-  
 129 chase time course of *Lp*-mCherry-pre-colonized flies continuously fed unlabeled *LpWF* or *Ai*-GFP-pre-  
 130 colonized flies continuously fed unlabeled *Ai*. Error bars: s.e.m. (D) Colonization efficiency quantified by  
 131 dose response to colonization of individual flies. CFUs quantified at 3 dpi of the second colonizer. *n*=24  
 132 flies/dose, error bars: standard error of the proportion. Limit of detection: 50 CFUs. (E) Spatial structure  
 133 of colonization dynamics in the proventriculus for a fly pre-colonized with *LpWF*-mCherry (red) invaded  
 134 by *LpWF*-GFP and imaged 1 hour post inoculation (hpi). (F) Optical x,z-slice.

135 To investigate the stability of bacterial colonization in the proventriculus, we performed a  
136 pulse-chase experiment in which we challenged *LpWF*-mCherry-pre-colonized flies with  
137 unlabeled *LpWF* fed in excess over the course of 10 d (Fig. 2B). *LpWF*-mCherry levels in the gut  
138 decreased by >90% over the first 5 d, from  $\sim 10^4$  to  $\sim 10^3$  CFUs/fly, and then remained at  $\sim 10^3$   
139 CFUs/fly for the following 5 d (Fig. 2C), indicating a small, bound population with little  
140 turnover and a larger associated population with a half-life of 2.5 d (95% c.i. 1.6 to 4.3 d). By  
141 contrast, *LpWCFSI*, a weakly-colonizing human isolate of *L. plantarum*, was quickly flushed  
142 from the gut (Fig. 2C). Similar dynamics were observed in *Ai* (Fig. 2C) with a half-life of 2.5 d  
143 (95% c.i. 1.3 to 6.5 d), indicating the niche has equivalent kinetic for both bacterial species.

144 Initial binding to the niche is a key step in the establishment of a new bacterial population  
145 prior to filling the niche. Establishment is dose-dependent (17), and our finding that the final  
146 abundance of late colonizers is lower than that of initial colonizers (Fig. S3D) suggested that the  
147 presence of prior colonizers would shift the dose-response curve. To quantify such priority  
148 effects, we fed a range of doses of *LpWF*-mCherry to individual *LpWF*-pre-colonized flies and  
149 measured the percentage that were colonized by *LpWF*-mCherry 3 d later. Consistent with our  
150 hypothesis, pre-colonized flies were less likely than germ-free flies to become colonized by an  
151 equal dose of *LpWF*-mCherry:  $\sim 10^3$  *LpWF*-mCherry CFUs were required for 50% of flies to be  
152 colonized, while 100% of germ-free flies ended up colonized by doses as low as  $10^2$  CFUs (Fig.  
153 2D). These findings demonstrate that the proventricular niche for *LpWF*, when occupied,  
154 strongly resists colonization by later doses of the same strain.

155 The relationship between the probability of establishment and the final abundance of  
156 successful colonizing bacteria suggests that the availability of open habitat regulates the chance  
157 of invasion. We formalized assumptions of this hypothesis by building an integrated theory of

158 initial colonization (17) and niche saturation (31) that predicts the likelihood of colonization,  
159  $P(N_0)$ , of an invading species inoculated at a dose of  $N_0$  as a function of the final abundance of  
160 the invading species,  $A(N_0)$ ,

$$161 \quad P(N_0) = (1 - p)^{A(N_0)/pk}, \quad (1)$$

162 where  $p$  is the colonization probability of an individual bacterial cell and  $k$  is the subpopulation  
163 size attained in a single successful colonization event Fig. S4A,B). This model allows us to  
164 estimate the scale at which the population is structured based on colonization probabilities and  
165 total bacterial abundances. For *LpWF*, Eq. 1 estimates a subpopulation size of  $k=600$  cells (Fig.  
166 S4C), which is roughly the number of cells contained in an individual furrow.

167 To test whether the later dose of *LpWF*-mCherry was spatially excluded by the resident  
168 *LpWF*, we constructed a GFP-expressing strain of *LpWF* and fed it to flies pre-colonized with  
169 *LpWF*-mCherry. We imaged whole fixed guts 1 h post inoculation (hpi) to capture *LpWF*-GFP  
170 cells before they passed out of the fly (Fig. 2E). In the proventriculus, the invading *LpWF*-GFP  
171 were localized along the central axis of the inner lumen, separated from the lumen wall by a  
172 layer of resident *LpWF*-mCherry (Fig. 2E,F) that was up to 10  $\mu\text{m}$  thick. The posterior  
173 proventriculus furrows were densely packed with *LpWF*-mCherry, while *LpWF*-GFP was largely  
174 absent from furrows, suggesting that these furrows are the sites of stable colonization. We  
175 confirmed that the fluorophores are not responsible for the differential colonization by feeding  
176 *LpWF*-mCherry to flies pre-colonized by unlabeled *LpWF* and quantifying the mCherry signal  
177 along the gut at 1 hpi and 24 hpi. At 24 hpi with a dose of  $\sim 10^4$  CFUs, flies pre-colonized by  
178 *LpWF* showed almost undetectable mCherry by microscopy (Fig. S3E-H). These results provide  
179 further support that the niche for *LpWF* is in the proventricular furrows. Unlike during initial  
180 colonization, in which bacteria rapidly enter and colonize the furrows, prior colonizers prevent



181 subsequent colonization, suggesting that there are a limited number of binding sites in the  
182 furrows for *LpWF* cells and that these sites are saturated by prior colonization. Consistent with  
183 this logic that niche priority is spatially-determined, in the cases when *LpWF*-GFP did show  
184 colonization ( $n=5$ ), the GFP-labeled cells were co-localized with each other a furrow rather than  
185 being evenly mixed with mCherry throughout the proventriculus (Fig. S3I).

186

### 187 ***Ai* and *LpWF* occupy separate niches within the proventriculus**

188 Interspecies interactions can have major impacts on ecosystem colonization through priority  
189 effects that include competitive exclusion and facilitation (32–36). Because *Ai* and *LpWF*  
190 colonize the same general location of the gut (Fig. 1C-F, S2A-C) and each strain excludes itself  
191 (Fig. 2D, 3A), we expected that they would exclude each other. To test this hypothesis, we  
192 measured each species' abundance and growth rate during co-colonization. To our surprise, both  
193 were unaffected (Fig. 3B,C, S5), demonstrating that the species have independent saturation of  
194 the niche. We also performed a dose-response assay to determine whether interactions affect  
195 establishment of new colonizers. By contrast to *Ai*'s self-exclusion, *Ai* colonization was  
196 facilitated by *LpWF* pre-colonization (Fig. 3A), while *LpWF* colonization was unaffected by the  
197 presence of *Ai* (Fig. S5A).

198 Fluorescence microscopy of guts co-colonized by *LpWF*-mCherry and *Ai*-GFP showed  
199 that *Ai* and *LpWF* co-colonized the same foregut regions (Fig. 3D), with distinct sectors of each  
200 species observed at the cellular scale (Fig. 3E,F). Thus, *LpWF* and *Ai* do not physically exclude  
201 one another, and instead the tissue appears to accommodate both strains.

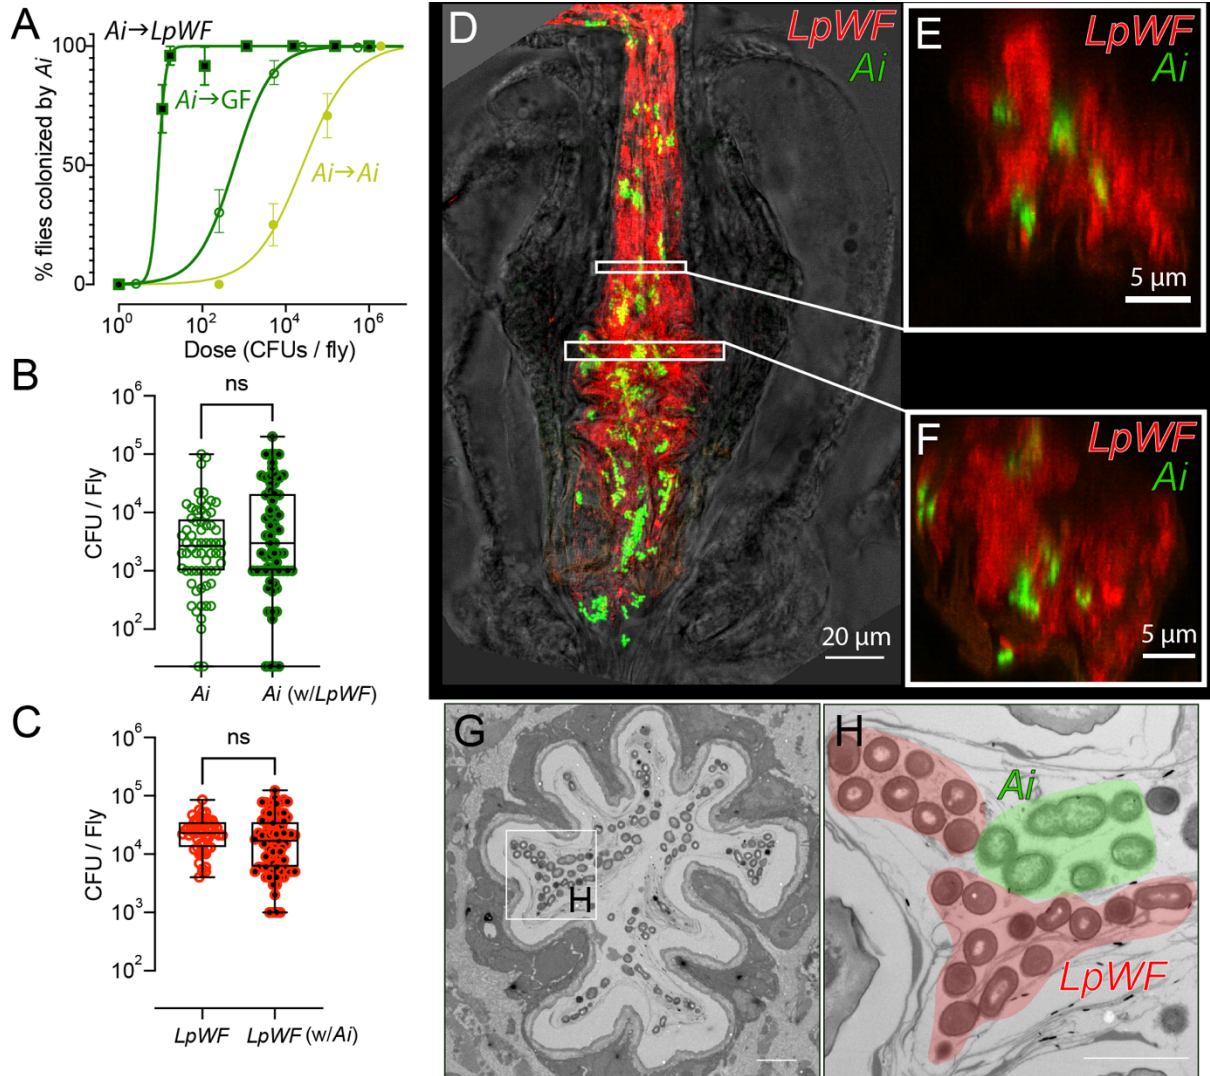

202 **Fig. 3. *Ai* and *LpWF* occupy separate niches within the proventriculus.** (A) Strain interactions  
 203 influence colonization efficiency as seen by dose-response curve for *Ai* fed to germ-free flies (open green  
 204 circles), *Ai*-pre-colonized flies (filled yellow circles), or *Lp*-pre-colonized flies (black-filled green  
 205 squares). Z-test of differences in proportion versus *Ai* into germ-free flies: dose  $10^{2.3}$  CFUs/fly,  $p=8.1 \times 10^{-4}$ ;  
 206 dose  $10^{3.7}$  CFUs/fly:  $p=4.8 \times 10^{-9}$ ; dose  $10^5$  CFUs/fly:  $p=8.7 \times 10^{-6}$ . Error bars: standard error of the  
 207 proportion. (B) *Ai* abundance at 5 dpi does not differ between flies monocolonized with *Ai* versus pre-  
 208 colonized with *LpWF* then fed *Ai*. (C) *LpWF* abundance 5 dpi does not differ between flies  
 209 monocolonized with *LpWF* versus pre-colonized with *Ai* then fed *LpWF* ( $n=60$  flies per treatment). (D)  
 210 Confocal microscopy of *Lp* and *Ai* co-colonization. *Ai* (green) and *LpWF* (red) occupy the same regions  
 211 of the foregut 1 dpi. Scale bar: 100 μm. (E,F) *x,z*-section of *Ai* and *LpWF* sectors. (G) TEM cross-section  
 212 of *Ai* and *LpWF* co-colonized anterior proventriculus. Scale bar: 5 μm. (H) Detail of G with *LpWF* and *Ai*  
 213 cells pseudocolored. Scale bar: 2 μm.

214

215

216

217 ***Colonization of the niche induces morphological alteration of the proventriculus***

218 To examine the coexistence of overlapping *Ai* and *LpWF* populations in a physically confined  
219 space, we imaged fly anatomy using X-ray microcomputed tomography (XR  $\mu$ CT) (37, 38), and  
220 segmented the volumetric image data to produce 3D reconstructions (Fig. 4A). We imaged germ-  
221 free flies and flies colonized with *LpWF*, *Ai*, or both *LpWF* and *Ai*. Numerous crypts were  
222 apparent along the length of the gut, including in uncolonized regions of the midgut and hindgut  
223 that are shielded by peritrophic matrix (Fig. 4A, S6) (39). In the colonized region of the foregut,  
224 the longitudinal striations where we observed bacteria coincided with ridges and furrows of host  
225 tissue in the proventriculus inner lumen and crop duct (Fig. 4B-F). The furrows were straight in  
226 the anterior proventriculus, becoming larger and more irregular in the posterior (Fig. 4D,F).  
227 Transverse slices of the lumen wall revealed a narrow passage through the germ-free  
228 proventriculus (Fig. 4C), while the opening was much broader in the colonized proventriculus  
229 (Fig. 4E), corresponding to a significantly higher luminal volume than in germ-free flies (Fig.  
230 4G).

231

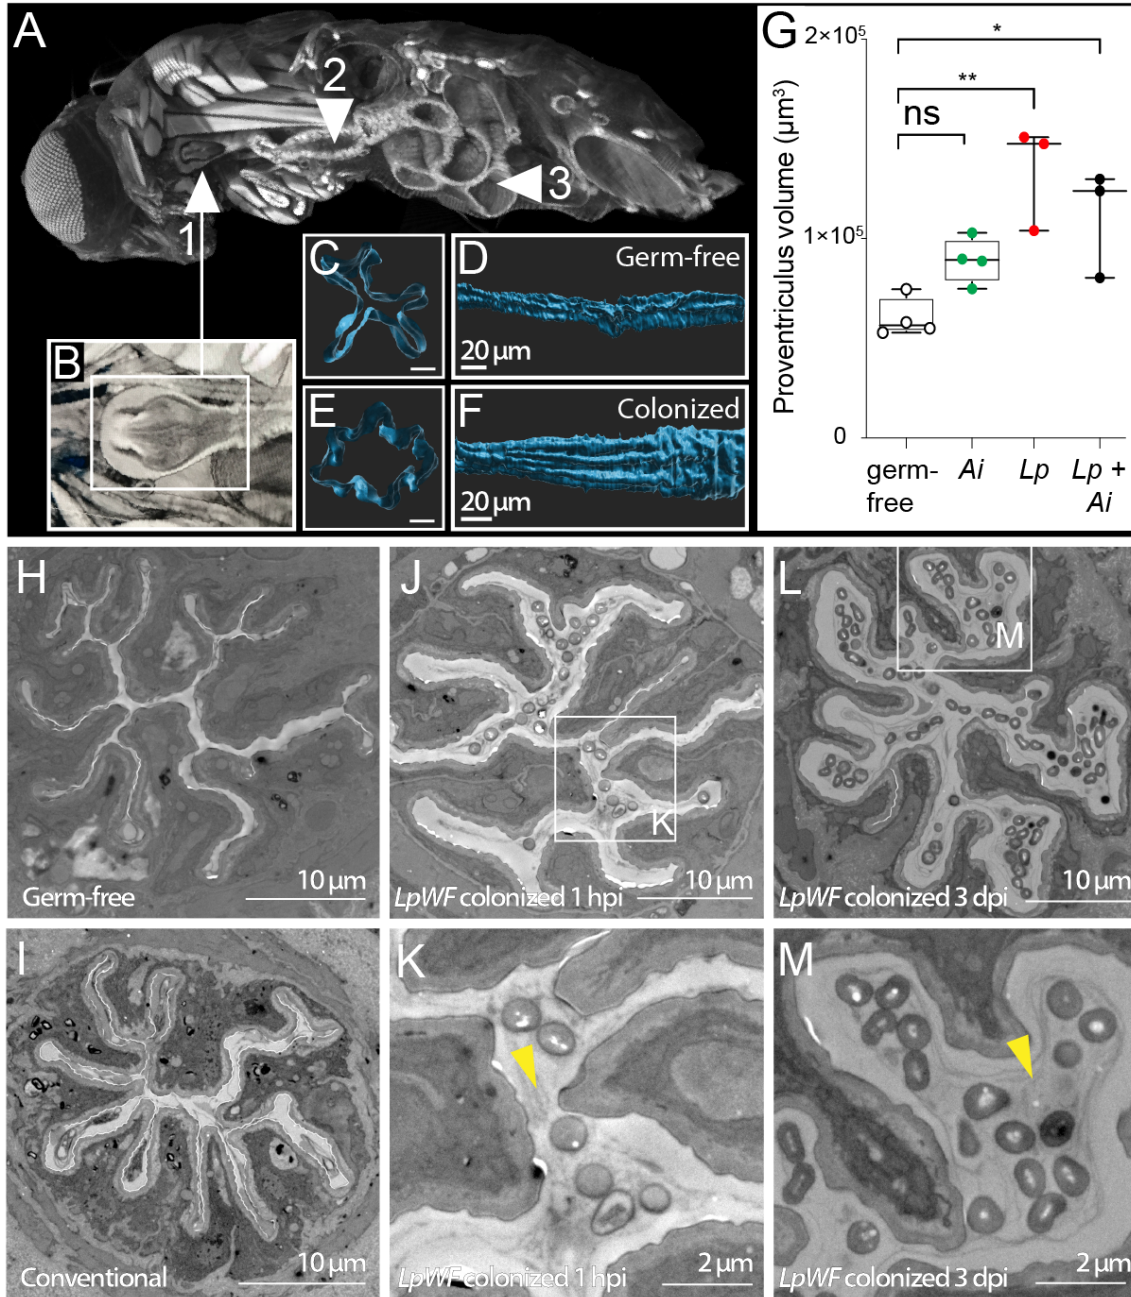

232 **Figure 4. Colonization of the niche induces morphological alteration of the proventriculus.** (A) XR  
 233  $\mu$ CT model of a whole fly. Cutaway shows exposed proventriculus (1, inset B), (2) anterior midgut, and  
 234 (3) posterior midgut. (B) Detail of proventriculus. (C) Cross-section of germ-free proventriculus inner  
 235 lumen. Scale bar: 5  $\mu$ m. (D) Germ-free proventriculus inner lumen volume rendering. Scale bar: 50  $\mu$ m.  
 236 (E) *LpWF*-colonized proventriculus inner lumen cross-section. Scale bar: 10  $\mu$ m. (F) *LpWF*  
 237 proventriculus inner lumen volume rendering. Scale bar: 50  $\mu$ m. (G) Cardia volume calculated from  
 238 surface models ( $n=3$  to 4 surfaces per condition;  $p=0.0025$ , one-way ANOVA relative to GF). (H)  
 239 Transmission electron microscopy transverse cross-section of anterior proventriculus in germ-free fly, (I)  
 240 conventionally-reared fly (only lab fly bacteria; no *LpWF*), (J-K) 1 hpi with *LpWF*, (L-M) 3 dpi  
 241 colonized with *LpWF* (see Fig. S7), Yellow arrowheads indicate lumen space.  
 242



243 Consistent with XR  $\mu$ CT imaging, TEM cross-sections of the proventriculus of germ-free  
244 flies showed a narrow luminal space, approximately 0.5  $\mu$ m in diameter (Fig. 4H, S7). Similar  
245 morphology was observed in conventionally-reared lab flies, which do not have the wild fly  
246 strains of bacteria (Fig. 4I). In *LpWF*-colonized flies, the diameter of the furrows increased to  $\sim$ 1  
247  $\mu$ m by 1 hpi (Fig. 4J,K, S7) and  $\sim$ 2 to 3  $\mu$ m by 3 dpi (Fig. 4L,M, S7E-J), suggesting a sustained  
248 host response to niche occupancy. The expanded luminal space of the colonized proventriculus  
249 contained two zones: a clear zone adjacent to the lumen wall, and a bacteria-colonized zone  
250 closer to the center of the lumen (Fig. 4L,M, S7E-J). High pressure freezing fixation (Fig. S7S)  
251 suggested that the zonation is not simply an artifact of fixation. This morphology is reminiscent  
252 of mammalian mucus, which has two layers: a dense, uncolonized layer adjacent to the  
253 epithelium, and a thinner, distal layer colonized by bacteria (40). Taken together, our imaging  
254 results show that the proventriculus undergoes morphological changes upon colonization, which  
255 coincide with the promotion of *Ai* colonization.

256

## 257 Discussion

258 Our results show that specific strains of *Drosophila* gut bacteria colonize crypt-like  
259 furrows in the proventriculus (Fig. 1C-F, 2E-F, S2, 3D-F, S3I, 4H-M), that the colonization by  
260 these strains is saturable (Fig. 2A, 3B,C, S2F), suggesting a limited number of binding sites, and  
261 that the proventriculus responds to colonization through engorgement (Fig. 4), which promotes  
262 colonization by bacteria that benefit the fly (Fig. 3A) (25, 26, 41). The finding that *Drosophila*  
263 has a specific niche for binding of commensals to sites in the crop duct and proventriculus is  
264 highly significant because it provides insight into how a microbiome can interact with the host in  
265 a manner that can be host-regulated and mutually beneficial. Furthermore, it predicts the



266 existence of specific molecules on the surface of the proventriculus that bind to the bacterial  
267 surface of colonization-competent strains but not with non-colonizing strains. The finding that  
268 binding of one strain can lead to structural changes that open up niche sites for a second species  
269 provides a model for how complex assemblies of bacterial strains can arise and be maintained  
270 within a host digestive tract.

271         Despite the long history of studies on the *Drosophila* microbiome, the existence of a  
272 specific niche has been obscured by the presence of bacteria in the food and on the culture  
273 medium during traditional culturing. A substantial fraction of gut bacteria under such conditions  
274 simply pass through and do not interact specifically with the gut (42), even though specific  
275 microbiome members bound to their associated niches might be present. We used bacterial  
276 pulse-chase protocols to push out unbound bacteria, greatly enriching for only specifically  
277 interacting cells.

278         Possession of a microbiome is clearly highly beneficial for *Drosophila*, given that axenic  
279 flies show strongly reduced growth and fecundity (22–25, 43, 44). However, it is less clear how  
280 the relationship between the host and specific strains of bacteria is stably perpetuated. We  
281 suggest that understanding the proventricular niche is likely to provide insight into microbiome  
282 function 1) by revealing the spatial locations where bacteria influence the host to introduce  
283 molecules into the gut, perhaps along with the peritrophic membrane; and 2) by revealing  
284 whether changes in niche structure induced by one species lay the groundwork for more complex  
285 associations between different members of the microbiome, such as *LpWF* and *Ai*, that are  
286 related to their functional pathways. Finally, these observations raise the question of whether  
287 additional niches exist at other locations in the *Drosophila* digestive system and within the gut of  
288 many other animals, including humans.

289 **References**

- 290 1. J. J. Faith, J. L. Guruge, M. Charbonneau, S. Subramanian, H. Seedorf, A. L. Goodman, J.  
291 C. Clemente, R. Knight, A. C. Heath, R. L. Leibel, M. Rosenbaum, J. I. Gordon, The  
292 long-term stability of the human gut microbiota. *Science*. **341**, 1237439 (2013).
- 293 2. L. A. David, A. C. Materna, J. Friedman, M. I. Campos-Baptista, M. C. Blackburn, A.  
294 Perrotta, S. E. Erdman, E. J. Alm, Host lifestyle affects human microbiota on daily  
295 timescales. *Genome Biol.* **15**, 1–15 (2014).
- 296 3. J. G. Caporaso, C. L. Lauber, E. K. Costello, D. Berg-Lyons, A. Gonzalez, J. Stombaugh,  
297 D. Knights, P. Gajer, J. Ravel, N. Fierer, J. I. Gordon, R. Knight, Moving pictures of the  
298 human microbiome. *Genome Biol.* **12**, R50 (2011).
- 299 4. M. C. Arrieta, L. T. Stiemsma, P. A. Dimitriu, L. Thorson, S. Russell, S. Yurist-Doutsch,  
300 B. Kuzeljevic, M. J. Gold, H. M. Britton, D. L. Lefebvre, P. Subbarao, P. Mandhane, A.  
301 Becker, K. M. McNagny, M. R. Sears, T. Kollmann, W. W. Mohn, S. E. Turvey, B. B.  
302 Finlay, Early infancy microbial and metabolic alterations affect risk of childhood asthma.  
303 *Sci. Transl. Med.* **7** (2015), doi:10.1126/scitranslmed.aab2271.
- 304 5. S. Subramanian, S. Huq, T. Yatsunenko, R. Haque, M. Mahfuz, M. A. Alam, A. Benezra,  
305 J. Destefano, M. F. Meier, B. D. Muegge, M. J. Barratt, L. G. VanArendonk, Q. Zhang,  
306 M. A. Province, W. A. Petri, T. Ahmed, J. I. Gordon, Persistent gut microbiota immaturity  
307 in malnourished Bangladeshi children. *Nature*. **510**, 417–421 (2014).
- 308 6. L. A. David, C. F. Maurice, R. N. Carmody, D. B. Gootenberg, J. E. Button, B. E. Wolfe,  
309 A. V Ling, A. S. Devlin, Y. Varma, M. A. Fischbach, S. B. Biddinger, R. J. Dutton, P. J.  
310 Turnbaugh, Diet rapidly and reproducibly alters the human gut microbiome. *Nature*, 1–18  
311 (2013).
- 312 7. K. M. Ng, J. A. Ferreyra, S. K. Higginbottom, J. B. Lynch, P. C. Kashyap, S. Gopinath, N.  
313 Naidu, B. Choudhury, B. C. Weimer, D. M. Monack, J. L. Sonnenburg, Microbiota-  
314 liberated host sugars facilitate post-antibiotic expansion of enteric pathogens. *Nature*. **502**,  
315 96–99 (2013).
- 316 8. L. Dethlefsen, D. A. Relman, Incomplete recovery and individualized responses of the  
317 human distal gut microbiota to repeated antibiotic perturbation. *Proc. Natl. Acad. Sci. U.*  
318 *S. A.* **108**, 4554–4561 (2011).
- 319 9. E. D. Sonnenburg, S. A. Smits, M. Tikhonov, S. K. Higginbottom, N. S. Wingreen, J. L.  
320 Sonnenburg, Diet-induced extinctions in the gut microbiota compound over generations.  
321 *Nature*. **529**, 212–215 (2016).
- 322 10. J. K. Kim, J. B. Lee, H. A. Jang, Y. S. Han, T. Fukatsu, B.-L. Lee, Understanding  
323 regulation of the host-mediated gut symbiont population and the symbiont-mediated host  
324 immunity in the Riptortus-Burkholderia symbiosis system. *Dev. Comp. Immunol.* **64**, 75–  
325 81 (2016).
- 326 11. Y. Kikuchi, T. Ohbayashi, S. Jang, P. Mergaert, Burkholderia insecticola triggers midgut  
327 closure in the bean bug Riptortus pedestris to prevent secondary bacterial infections of  
328 midgut crypts. *ISME J.*, 1–12 (2020).
- 329 12. M. J. McFall-Ngai, The importance of microbes in animal development: lessons from the  
330 squid-vibrio symbiosis. *Annu. Rev. Microbiol.* **68**, 177–194 (2014).
- 331 13. C. Fung, S. Tan, M. Nakajima, E. C. Skoog, L. F. Camarillo-Guerrero, J. A. Klein, T. D.

- 332 Lawley, J. V. Solnick, T. Fukami, M. R. Amieva, High-resolution mapping reveals that  
333 microniches in the gastric glands control *Helicobacter pylori* colonization of the stomach.  
334 *PLoS Biol.* **17**, 1–28 (2019).
- 335 14. S. M. Lee, G. P. Donaldson, Z. Mikulski, S. Boyajian, K. Ley, S. K. Mazmanian, Bacterial  
336 colonization factors control specificity and stability of the gut microbiota. *Nature.* **501**,  
337 426–429 (2014).
- 338 15. A. E. Douglas, The *Drosophila* model for microbiome research. *Lab Anim. (NY).* **47**, 157–  
339 164 (2018).
- 340 16. A. Saffarian, C. Mulet, B. Regnault, A. Amiot, J. Tran-Van-Nhieu, J. Ravel, I. Sobhani, P.  
341 J. Sansonetti, T. Pédrón, Crypt- and Mucosa-Associated Core Microbiotas in Humans and  
342 Their Alteration in Colon Cancer Patients. *MBio.* **10**, G351-20 (2019).
- 343 17. B. Obadia, Z. T. Güvener, V. Zhang, J. A. Ceja-Navarro, E. L. Brodie, W. W. Ja, W. B.  
344 Ludington, Probabilistic Invasion Underlies Natural Gut Microbiome Stability. *Curr. Biol.*  
345 **27** (2017), doi:10.1016/j.cub.2017.05.034.
- 346 18. N. A. Broderick, B. Lemaitre, Gut-associated microbes of *Drosophila melanogaster*. *Gut*  
347 *Microbes.* **3**, 307–321 (2012).
- 348 19. C. N. A. Wong, P. Ng, A. E. Douglas, Low-diversity bacterial community in the gut of the  
349 fruitfly *Drosophila melanogaster*. *Environ. Microbiol.* **13**, 1889–1900 (2011).
- 350 20. W. B. Ludington, W. W. Ja, *Drosophila* as a model for the gut microbiome. *PLoS Pathog.*  
351 **16** (2020), doi:10.1371/journal.ppat.1008398.
- 352 21. A. E. Douglas, Simple animal models for microbiome research. *Nat. Rev. Microbiol.*, 1–  
353 12 (2019).
- 354 22. A. W. Walters, R. C. Hughes, T. B. Call, C. J. Walker, H. Wilcox, S. C. Petersen, S. M.  
355 Rudman, P. D. Newell, A. E. Douglas, P. S. Schmidt, J. M. Chaston, The microbiota  
356 influences the *Drosophila melanogaster* life history strategy. *Mol. Ecol.* **29**, 639–653  
357 (2020).
- 358 23. H.-Y. Lee, S.-H. Lee, J.-H. Lee, W.-J. Lee, K.-J. Min, The role of commensal microbes in  
359 the lifespan of *Drosophila melanogaster*. *Aging (Albany, NY).* **11** (2019).
- 360 24. M. A. Téfit, F. Leulier, *Lactobacillus plantarum* favors the early emergence of fit and  
361 fertile adult *Drosophila* upon chronic undernutrition. *J. Exp. Biol.* **220**, 900–907 (2017).
- 362 25. J. Consuegra, T. Grenier, H. Akherraz, I. Rahioui, H. Gervais, P. da Silva, F. Leulier,  
363 Metabolic cooperation among commensal bacteria supports *Drosophila* juvenile growth  
364 under nutritional stress. *iScience*, 101232 (2020).
- 365 26. S. F. Henriques, D. B. Dhakan, L. Serra, A. P. Francisco, Z. Carvalho-Santos, C. Baltazar,  
366 A. P. Elias, M. Anjos, T. Zhang, O. D. K. Maddocks, C. Ribeiro, Metabolic cross-feeding  
367 in imbalanced diets allows gut microbes to improve reproduction and alter host behaviour.  
368 *Nat. Commun.* **11**, 4236 (2020).
- 369 27. A. L. Gould, V. Zhang, L. Lamberti, E. W. Jones, B. Obadia, N. Korasidis, A.  
370 Gavryushkin, J. M. Carlson, N. Beerenwinkel, W. B. Ludington, Microbiome interactions  
371 shape host fitness. *Proc. Natl. Acad. Sci. U. S. A.* **115**, E11951–E11960 (2018).
- 372 28. H. Eble, M. Joswig, L. Lamberti, W. B. Ludington, Cluster partitions and fitness  
373 landscapes of the *Drosophila* fly microbiome. *J. Math. Biol.* **79** (2019),  
374 doi:10.1007/s00285-019-01381-0.

- 375 29. I. S. Pais, R. S. Valente, M. Sporniak, L. Teixeira, *Drosophila melanogaster* establishes a  
376 species-specific mutualistic interaction with stable gut-colonizing bacteria. *PLoS Biol.* **16**,  
377 e2005710 (2018).
- 378 30. D. G. King, Cellular-Organization and Peritrophic Membrane Formation in the Cardia  
379 (Proventriculus) of *Drosophila-Melanogaster*. *J. Morphol.* **196**, 253–282 (1988).
- 380 31. D. Tilman, Competition and Biodiversity in Spatially Structured Habitats. *Ecology.* **75**, 2–  
381 16 (1994).
- 382 32. K. G. Peay, M. Belisle, T. Fukami, Phylogenetic relatedness predicts priority effects in  
383 nectar yeast communities | Proceedings of the Royal Society of London B: Biological  
384 Sciences. *Proc. R. Soc. B Biol. Sci.* (2011).
- 385 33. D. R. Amor, C. Ratzke, J. Gore, Transient invaders can induce shifts between alternative  
386 stable states of microbial communities. *Sci. Adv.* **6**, 1–9 (2020).
- 387 34. J. Friedman, L. M. Higgins, J. Gore, Community structure follows simple assembly rules  
388 in microbial microcosms. *Nat. Publ. Gr.* **1**, 1–7 (2017).
- 389 35. I. Martínez, M. X. Maldonado-Gomez, J. C. Gomes-Neto, Experimental evaluation of the  
390 importance of colonization history in early-life gut microbiota assembly. *Elife* (2018).
- 391 36. M. X. Maldonado-Gómez, I. Martínez, F. Bottacini, A. O’Callaghan, M. Ventura, D. van  
392 Sinderen, B. Hillmann, P. Vangay, D. Knights, R. W. Hutkins, J. Walter, Stable  
393 Engraftment of *Bifidobacterium longum* AH1206 in the Human Gut Depends on  
394 Individualized Features of the Resident Microbiome. *CHOM.* **20**, 515–526 (2016).
- 395 37. A. L. Mattei, M. L. Riccio, F. W. Avila, M. F. Wolfner, Integrated 3D view of postmating  
396 responses by the *Drosophila melanogaster* female reproductive tract, obtained by micro-  
397 computed tomography scanning. *Proc. Natl. Acad. Sci.* **112**, 8475–8480 (2015).
- 398 38. T. A. Schoborg, S. L. Smith, L. N. Smith, H. Douglas Morris, N. M. Rusan, Micro-  
399 computed tomography as a platform for exploring *Drosophila* development. *Dev.* **146**  
400 (2019), doi:10.1242/dev.176685.
- 401 39. N. Buchon, D. Osman, F. P. A. David, H. Y. Fang, J.-P. Boquete, B. Deplancke, B.  
402 Lemaitre, Morphological and molecular characterization of adult midgut  
403 compartmentalization in *Drosophila*. *Cell Rep.* **3**, 1725–1738 (2013).
- 404 40. G. G. Altmann, Morphological observations on mucus-secreting nongoblet cells in the  
405 deep crypts of the rat ascending colon. *Am. J. Anat.* **167**, 95–117 (1983).
- 406 41. A. J. Sommer, P. D. Newell, Metabolic Basis for Mutualism between Gut Bacteria and Its  
407 Impact on the *Drosophila melanogaster* Host. *Appl. Environ. Microbiol.* **85** (2019).
- 408 42. J. E. Blum, C. N. Fischer, J. Miles, J. Handelsman, Frequent Replenishment Sustains the  
409 Beneficial Microbiome of *Drosophila melanogaster*. *MBio.* **4**, e00860-13-e00860-13  
410 (2013).
- 411 43. E. S. Keebaugh, R. Yamada, B. Obadia, W. B. Ludington, W. W. Ja, Microbial Quantity  
412 Impacts *Drosophila* Nutrition, Development, and Lifespan. *iScience.* **4** (2018),  
413 doi:10.1016/j.isci.2018.06.004.
- 414 44. T. Brummel, A. Ching, L. Seroude, A. F. Simon, S. Benzer, *Drosophila* lifespan  
415 enhancement by exogenous bacteria. *Proc. Natl. Acad. Sci.* **101**, 12974–12979 (2004).
- 416 45. K. Spath, S. Heintl, E. Egger, R. Grabherr, *Lactobacillus plantarum* and *Lactobacillus*  
417 *buchneri* as Expression Systems: Evaluation of Different Origins of Replication for the

418 Design of Suitable Shuttle Vectors. *Mol. Biotechnol.* **52**, 40–48 (2011).  
419 46. C. J. Marx, M. E. Lidstrom, Development of improved versatile broad-host-range vectors  
420 for use in methylotrophs and other gram-negative bacteria. *Microbiology.* **147**, 2065–2075  
421 (2001).

422

423 **Acknowledgements:** Plasmid pCD256-mCherry (45) was generously provided by Reingard  
424 Grabherr, PhD of BOKU, Austria. Plasmid pCM62 (46) was generously provided by Elizabeth  
425 Skovran, PhD of SJSU, USA.

426

427 **Funding:**

428 Banting and Pacific Institute for the Mathematical Sciences Postdoctoral Fellowships (EWJ)

429 Howard Hughes Medical Institute International Student Research fellow (AA-D)

430 Stanford Bio-X Bowes fellow (AA-D)

431 Siebel Scholar (AA-D)

432 Allen Discovery Center at Stanford on Systems Modeling of Infection (KCH)

433 Chan Zuckerberg Biohub (KCH)

434 The David and Lucile Packard Foundation (JMC)

435 Institute for Collaborative Biotechnologies through Grant W911NF-09-0001 from the US  
436 Army Research Office (JMC)

437 Natural Sciences and Engineering Research Council of Canada Discovery Grant (DAS)

438 Canada Research Chairs program (DAS)

439 The Howard Hughes Medical Institute (ACS, CW)

440 National Institutes of Health grant DP5OD017851 (WBL, BO)

441 National Science Foundation grant IOS 2032985 (WBL, RD, DM)

442 Carnegie Institution for Science Endowment (WBL, HZ, KA, RD, DM)

443 Carnegie Institution of Canada grant (WBL, DAS, EWJ)

444 National Institutes of Health training grant T32GM007231 (KA, ZL)

445 **Author Contributions:**

446 Research Design: RD, EWJ, HZ, BO, CW, EB, JMC, DS, AS, WBL

447 Performed Research: RD, EWJ, HZ, BO, DM, CW, KA, AA-D, MV

448 Analyzed Data: RD, EWJ, WBL

449 Wrote manuscript: RD, WBL

450 Revised the Manuscript: RD, EWJ, KCH, DAS, JMC, ACS, WBL

451 All authors reviewed the manuscript before submission.



452

453 **Competing Interests:** Authors declare that they have no competing interests.

454

455 **Data and materials availability:** All data are available in the main text or the supplementary  
456 materials.

457

458 **Supplementary Materials**

459 Materials and Methods

460 Supplementary Text

461 Figs. S1 to S9

462 Movie S1

463

464 **Main Figures and Legends are in-line with main text**

1  
2  
3  
4  
5  
6  
7  
8  
9  
10  
11  
12  
13  
14  
15  
16  
17  
18  
19  
20  
21  
22  
23  
24  
25  
26  
27  
28

## Supplementary Materials for

### **A gut commensal niche regulates stable association of a multispecies microbiota**

**Authors:** Ren Dodge<sup>1</sup>, Eric Jones<sup>2,3</sup>, Haolong Zhu<sup>1,4</sup>, Benjamin Obadia<sup>5</sup>, Daniel J. Martinez<sup>1</sup>, Chenhui Wang<sup>1,6</sup>, Andrés Aranda-Díaz<sup>7</sup>, Kevin Aumiller<sup>1,4</sup>, Zhexian Liu<sup>4</sup>, Marco Voltolini<sup>8</sup>, Eoin L. Brodie<sup>8</sup>, Kerwyn Casey Huang<sup>7,9,10</sup>, Jean Carlson<sup>3</sup>, David Sivak<sup>2</sup>, Allan C. Spradling<sup>1,4,6</sup>, William B. Ludington<sup>1,4\*</sup>

Correspondence to: [ludington@carengiescience.edu](mailto:ludington@carengiescience.edu)

#### **This PDF file includes:**

- Materials and Methods
- Supplementary Text
- Figs. S1 to S9
- Caption for Movie S1

#### **Other Supplementary Materials for this manuscript include the following:**

- Movies S1

## 29 **Materials and Methods**

30

### 31 ***Fly strains and rearing***

32 All flies in this study were mated females, which show low heterogeneity in gut morphology  
33 (45). Previous work showed that the colonization phenotypes we measure are general across  
34 multiple genetic backgrounds including CantonS, *w<sup>1118</sup>*, and OregonR (17). Flies were reared in  
35 Wide Drosophila Vials (Cat #: 32-114, Genesee), with Droso-Plugs® (Cat #: 59-201, Genesee).  
36 Food composition was 10% glucose (filter-sterilized), 5% autoclaved live yeast, 0.42% propionic  
37 acid (filter-sterilized), 1.2% autoclaved agar, and 0.5% cornmeal. Each vial contained 4 mL of  
38 food. Germ free fly stocks were passaged to fresh vials every 3-4 d. Five day-old mated female  
39 adults were sorted the day prior to beginning an experiment.

40       Liquid food was composed of 10% glucose, 5% yeast extract, and 0.42% propionic acid.  
41 The only nutritional difference between liquid and solid food was yeast extract instead of  
42 autoclaved live yeast because the yeast cell walls clog the capillaries used for liquid feeding. The  
43 bottom of capillary feeder vials contained 1.2% agar as a hydration and humidity source. Both  
44 CAFÉ- and solid food-fed flies were transferred daily to fresh vials to minimize bacterial re-  
45 ingestion. Samples of flies were surface-sterilized and crushed, and CFUs were enumerated at 0,  
46 2, and 4 dpi.

47

### 48 ***Bacterial strains***

49 Bacterial strains were reported in (17), including *Lactobacillus plantarum* WF, *L. plantarum* LF,  
50 and *L. plantarum* WCFS1, which was called *L. plantarum* HS in (17). *Acetobacter indonesiensis*  
51 SB003 was assayed for colonization in Fig. S1 of (17). Fluorescent protein-expressing plasmid  
52 strains were developed and reported in (17) and (44). pCD256-p11-mCherry, used for *L.*

53 *plantarum*, was the generous gift of Reingard Grabherr (BOKU, Austria) (46). pCM62, used for  
54 *Acetobacter indonesiensis*, was the generous gift of Elizabeth Skovran (SJSU, USA).

55

### 56 ***Colonization assay***

57 The colonization assay followed the protocol used in Fig. S1A of (17). Briefly, a measured dose  
58 of bacteria was pipetted evenly on the surface of a germ-free fly food vial and allowed to absorb  
59 for 15 min. 25 germ-free, 5- to 7-d post-eclosion, mated female flies were introduced to the vial  
60 and allowed to feed for a defined period of time. Flies were then removed from the inoculation  
61 vial and placed in fresh, germ-free vials. Bacteria were collected from the inoculation vial by  
62 vigorous rinsing with PBS, and the abundance was quantified by CFUs. At specified time points,  
63 CFUs in individual flies were enumerated by washing the flies 6 times in 70% ethanol, followed  
64 by rinsing in ddH<sub>2</sub>O, and then crushing and plating for CFU enumeration.

65

### 66 ***Preparation of bacteria***

67 Cultures of bacteria were grown overnight in 3 mL liquid media at 30 °C. *Lp* strains were grown  
68 in MRS liquid media (Hardy Diagnostics, #445054), and 10 µg/mL chloramphenicol was added  
69 for mCherry-expressing strains. *Ai* was grown in MYPL media, and 25 µg/mL tetracycline was  
70 added for GFP-expressing strains. Bacteria were pelleted by spinning for 3 min at 3000 rpm,  
71 resuspended in PBS, then diluted to the desired concentration. Dose size was quantified using  
72 OD<sub>600</sub> or by plating and counting CFUs. OD of 1.0 corresponds to 2×10<sup>8</sup> CFUs/mL for *LpWF*  
73 and 3×10<sup>8</sup> CFUs/mL for *Ai*.

74

75

76 ***Inoculation of flies***

77 Flies were inoculated by pipetting 50  $\mu$ L of an appropriate concentration of the inoculum onto  
78 the food and then left to dry in the biosafety cabinet for 15 min. Flies were starved for 4 h before  
79 flipping them into the inoculation vials, where they were allowed to feed for 1 h, then flipped to  
80 fresh vials. The dose per fly was calculated as the amount of inoculum consumed divided by the  
81 number of flies in the vial. To verify that flies ate the bacteria placed on the food and measure  
82 the amount of ingested inoculum, uneaten bacteria were recovered from the vial after feeding  
83 and subtracted from the original dose. For experiments to standardize the dose of bacteria, the  
84 vial was an inverted 50-mL conical vial with solidified agar food in the cap. This vial allows for  
85 separation of food CFUs from CFUs on the walls of the vial. For other experiments, the vial was  
86 an autoclaved, polypropylene wide fly vial (FlyStuff).

87

88 ***Quantification of CFUs in flies***

89 Abundance in the gut was measured by homogenizing whole flies then plating to count CFUs.  
90 Flies were first anesthetized using CO<sub>2</sub> and surface-sterilized by washing twice in 70% ethanol,  
91 then twice in PBS. Next, they were placed individually into wells of a 96-well plate along with  
92 100  $\mu$ L PBS and  $\sim$ 50  $\mu$ L of 0.5- $\mu$ m glass beads (Biospec) and heat-sealed (Thermal Bond Heat  
93 Seal Foil, 4titude). The plate was shaken violently for 4 min at 2100 rpm on a bead beater  
94 (Biospec Mini-beadbeater-96, #1001) to homogenize the flies. We previously showed that the  
95 0.5- $\mu$ m bead size does not diminish bacterial counts and effectively disrupts fly tissue (17). A  
96 dilution series of the entire plate was prepared using a liquid-handling robot (Benchsmart). Agar  
97 growth medium was prepared in rectangular tray plates, which were warmed and dried  $\sim$ 30 min  
98 prior to plating. Plates were inoculated with 2  $\mu$ L of fly homogenate per well, which leads to a



99 circular patch for CFU enumeration. The plates were incubated at 30 °C overnight. To count  
100 colonies, plates were photographed under fluorescent light and counted semi-automatically using  
101 ImageJ.

102

### 103 *Measurement of CFUs in fly vial*

104 The number of bacteria in a fly vial was measured by recovering cells from the vial and plating  
105 on nutrient agar growth media (MRS or MYPL) to count CFUs. To collect bacteria, 2 mL of  
106 sterile PBS were pipetted into the vial. The vial was then replugged and vortexed for 10 s. A  
107 dilution series was made starting with 100 µL of the PBS wash and then plated to count CFUs.  
108 This method was used to quantify viable bacteria egested (pooped) by flies, or bacterial growth  
109 in the vial or the remainder of uneaten inoculum. Egestion and inoculation were measured over a  
110 period of 1-2 h, minimizing the opportunity for new bacterial growth.

111

### 112 *CAFÉ assay*

113 Twelve flies were placed in a sterile polypropylene wide mouth fly vial containing 2 mL of 1.2%  
114 agar in ddH<sub>2</sub>O. Four glass capillary tubes were inserted through the flug and filled with 12 µL of  
115 filter-sterilized liquid fly food (10% glucose, 5% yeast extract, 0.42% propionic acid). Ten  
116 microliters of overlay oil were added on top to push the liquid food to the bottom of the  
117 capillary. Flies were left in the vial for 24 h before being transferred to a fresh setup. Vials were  
118 checked every 12 h to ensure flies had access to food, and a fresh flug with new capillaries was  
119 inserted if capillaries had air in them, which prevents food access. Five fly vials were put  
120 together into a 1-L beaker with a wet paper towel at the bottom and aluminum foil over the top,

121 and the beaker was placed in the back of a fly incubator set to 25 °C, 12 h-12 h light-dark  
122 cycling, and 60% relative humidity.

123

### 124 ***Pulse-chase protocol for bacterial colonization***

125 To estimate the turnover time of established bacterial populations, 5- to 7-day old mated female  
126 flies were kept with 25 flies/vial. Flies were first inoculated with a pulse of fluorescently  
127 labeled, antibiotic-resistant bacteria by pipetting 50  $\mu$ L of culture resuspended in PBS ( $OD_{600}=1$ )  
128 onto the food and allowing it to dry prior to flipping flies into the inoculation vial. The pulse  
129 dose was allowed to establish colonization in the gut for 3 d prior to chase. Flies were fed a chase  
130 dose in the same way each day for 10 d ( $OD_{600}=1$ ). The abundance of labeled resident was  
131 measured daily by homogenizing and plating a sample of flies on selective media to count CFUs.  
132 The invading chase dose was assayed by plating on non-selective media. To control for any other  
133 factors that might affect resident abundance, a control group was also passaged daily to fresh  
134 food with no chase dose and assayed daily to count CFUs.

135

### 136 ***Pulse-chase analysis***

137 Experiments were conducted in triplicate. Measurements from individual flies from the different  
138 experiments were pooled by timepoint. Data were fit to an exponential decay using prism, and  
139 the half-life with its confidence interval was reported.

140

### 141 ***Measurement of growth rates in vivo***

142 Plasmid loss in the absence of selection was used as a proxy for bacterial growth rate. Briefly, a  
143 standard curve was constructed by passaging plasmid-containing cells to fresh media twice daily

144 in a ~1:100 dilution to an OD of 0.01 for 6 d. The number of bacterial generations was estimated  
145 by counting the number of CFUs in the culture prior to dilution. The ratio of plasmid-containing  
146 CFUs to plasmid-free CFUs was counted as the number of fluorescent to non-fluorescent  
147 colonies. We note that the doubling time is roughly 2 h for each strain. A linear regression was  
148 used to fit an equation to the standard curve data. Flies were then fed 100% plasmid-containing  
149 cells. The ratio of plasmid-containing to plasmid-free CFUs was counted at various time points  
150 in the experiments, and the standard curve was used to convert the ratio to the number of  
151 doublings. In the case of dual-plasmid containing strains (Fig. S7C), growth was measured as a  
152 ratio of colonies positive for GFP-Erm plasmids (which are lost rapidly) to those positive for  
153 mCherry-Cam (which is retained much longer). A non-linear (exponential decay) regression was  
154 used. Two caveats we note are that (1) population bottlenecks cause wider variance in the  
155 plasmid ratio, and (2) *in vivo* plasmid loss rates may be different from *in vitro* rates. We  
156 previously showed that the first caveat, high variance due to bottlenecks, can be used to infer  
157 bottlenecks. We also note that with respect to the second caveat, our use of this method to  
158 compare growth rates in a controlled experiment does not necessitate an absolute growth  
159 measurement with a standard curve. Furthermore, the growth rates *in vivo* were similar to *in*  
160 *vitro*, meaning that any differences in plasmid loss rates due to differences in the growth phase of  
161 the cells are likely small.

162

### 163 ***Cropectomy***

164 Cropectomy was performed on live flies using only new, undamaged fine forceps (#5, Dumont).  
165 Forceps, flypad, and microscope area were cleaned with 70% ethanol. Five- to 10-day old female  
166 flies were first anesthetized using CO<sub>2</sub> then placed on a depression slide for surgery. The fly was

167 positioned on its back, and while holding the torso with one set of forceps a small puncture was  
168 made in the abdomen just below the thorax as shown in Fig. 1O. Pressure on the forceps was  
169 released slightly to allow the tips to open up, then grab onto the crop and pull it out through the  
170 puncture. If the crop duct was still attached, it was severed along the edge of a forceps. Flies  
171 were placed in a sterile food vial and given at least 3 d to recover. Survival rate was ~1 in 10  
172 flies.

173

#### 174 *Preparation of samples for microscopy*

175 Whole guts were removed from the fly by dissection with fine forceps (Dumont). Tissue was  
176 fixed in 4% PFA in PBS for 3 h at 24 °C or at 4 °C overnight. Guts were permeabilized using  
177 0.1% Triton-X in PBS for 30 min at room temperature, washed twice in PBS, stained with 10  
178 µg/mL DAPI for 30 min, washed twice in PBS, placed in mounting medium for up to 1 h, then  
179 transferred to the slide using a wide bore 200-µL pipette. Each gut was then positioned on a  
180 positively charged glass microscope slide, and approximately 60 µL of mounting medium was  
181 added (mounting medium: 80% glycerol, 20% 0.1M Tris 9.0, 0.4g/L N-propyl gallate). Five to  
182 ten 0.1-mm glass beads (Biospec) were added to the mounting medium to form a spacer that  
183 prevents crushing of the sample. The slide was then covered with a No. 1.5 cover glass and  
184 sealed with nail polish.

185

#### 186 *Confocal microscopy*

187 Microscopy was conducted with a Leica DMI8 confocal microscope using either a 40X (1.30  
188 NA) HC Plan Apo or a 60X (1.40 NA) HC Plan Apo oil immersion objective. Laser lines were  
189 generated using a white-light laser with AOTF crystal, and excitation wavelengths for

190 fluorophores were: mGFP5, 488 nm; mCherry, 591 nm; Cy5, 650 nm. Whole gut images were  
191 generated by tiling multiple captures then merging using the Mosaic Merge function in LAS X to  
192 stitch into a single stack. Z-stacks for whole guts were 70-80  $\mu\text{m}$  in thickness with slices every  
193 0.5  $\mu\text{m}$  or less. To render two-dimensional images for publication, fluorescence channels were  
194 processed as maximum intensity z-projections and the brightfield channel is represented by a  
195 single z-slice from the middle of the stack.

196

### 197 *Measurement of fluorescence intensities*

198 Fluorescence intensity of gut colonization was quantified using FIJI. Summed intensity z-  
199 projections of 80- $\mu\text{m}$  optical sections were generated, then resized to a scale of 1  $\mu\text{m}/\text{px}$ .

200 Background subtraction with a rolling ball radius of 50 px was applied. A segmented line with  
201 spline fit and a width of 50  $\mu\text{m}$  was drawn along the length of the gut, starting with the most  
202 distal point on the crop as the origin. The “Plot Profile” function was used to measure the  
203 intensity along each of 5 segments: crop, crop duct, proventriculus, midgut, and hindgut.

204 Segment length was normalized to a standard length. Intensity was normalized by averaging each  
205 replicate then normalizing the means.

206

### 207 *Measurement of beads egested*

208 To measure shedding of polystyrene beads (Spherotech FP-0552-2, sky blue), flow cytometry  
209 was used to quantify the number of egested beads. Flies were kept in inverted 50-mL conical  
210 tubes with 1 mL solid food in the cap. To collect shed material, the tubes were rinsed with 10 mL  
211 of PBS, vortexed for 10 s, and then a clean cap was placed on top. To concentrate the solution,  
212 the samples were spun in a centrifuge for 7 min at 3000 rpm. The pellet was then resuspended in

213 200  $\mu$ L of PBS. The concentrated sample was counted on an Attune flow cytometer (Thermo  
214 Fisher).

215

### 216 ***Electron microscopy***

217 Whole guts were dissected in Cacodylate pH 7.4 (Cac) buffer, then fixed for 2 d in 3%  
218 GA+1%FA in 0.1 M Cac at 4 °C. Samples were embedded in agarose and stored at 4 °C until  
219 further processing. Samples were then washed in Cac buffer, stained with 1% OsO<sub>4</sub>+1.25%  
220 KfcCN for 1 h, washed in water, treated with 0.05 M Maleate pH 6.5 (Mal), stained with 0.5%  
221 Uranyl Acetate in Mal for 1.25 h, then washed with increasing concentrations of ethanol. For  
222 embedding in resin, samples were treated with resin+propylene oxide (1:1) evaporated overnight  
223 as a transition solvent prior to embedding, then embedded in epoxy resin (Epon+Quetol  
224 (2:1)+Spurr (3:1)+2% BDMA overnight at 55 °C and cured at 70 °C for 4 d.

225

### 226 ***X-ray microcomputed tomography (XR $\mu$ CT)***

227 Samples were prepared for XR  $\mu$ CT following the protocol of Schoborg et al 2019 (36), which  
228 the authors generously shared prior to publication. Briefly, flies were washed in 1% Triton-X in  
229 PBS to reduce cuticular wax. A shallow hole was poked in the abdomen and thorax with a fine  
230 tungsten pin to increase permeation of fixative and stain. Fixation was with Bouin's solution.  
231 Staining was with phosphotungstic acid for 3 weeks. Flies were mounted for imaging in a 10- $\mu$ L  
232 micropipette tip containing deionized water and sealed with parafilm. Imaging was performed at  
233 the Lawrence Berkeley National Laboratory's synchrotron Advanced Light Source on beamline  
234 8.3.2 with assistance of Dula Parkinson. 1313 images were acquired per specimen at 20X



235 magnification through 180 degrees of rotation. Back-projections were performed using Tomopy  
236 with the following specifications:

237 *doFWringremoval 0 doPhaseRetrieval 1 alphaReg 0.5 doPolarRing 1 Rmaxwidth 30*  
238 *Rtmax 300*

239 Further specifications are available here: <http://microct.lbl.gov/>. The images in Figures 6A,B  
240 were produced in Octopus. Volumetric reconstructions of the gut lumen in Figure D-G were  
241 performed in Imaris using manual segmentation.

242

### 243 ***Statistics***

244 Statistical tests were performed in Prism. In general, data were checked for normality using a  
245 Shapiro-Wilk test. If normality was established, a Welch's t-test was performed. Statistical tests  
246 of CFU abundances were performed on log<sub>10</sub>-transformed data. When CFUs were 0, the log was  
247 set to 0 (corresponding to a pseudocount of 1). When multiple comparisons were made, an  
248 ordinary one-way ANOVA was performed. If significant, multiple pairwise comparisons were  
249 performed with Tukey's multiple comparisons test. When data was not normally distributed,  
250 comparisons were made using Wilcoxon rank-order tests. Error bars on proportions are either  
251 standard error of the proportion (s.e.p.), or binomial 95% confidence intervals using the Clopper-  
252 Pearson method or Jeffries method, as specified in the text. The statistical significance of  
253 differences in proportions were assessed using a Z-test.

254

255

256

257

258 **Supplementary Text**

259

260 ***Ai* exhibits increased early death rates in germ-free flies**

261 To probe the facilitation of *Ai* colonization by *LpWF*, we examined the dynamics of *Ai*  
262 colonization from 1 hpi to 6 dpi (Fig. S2F, S5F-M, S8). For the first 1 dpi, *Ai* abundance was  
263 significantly higher in *LpWF*-pre-colonized versus germ-free flies (Fig. 3A, S5F). After 2 dpi, *Ai*  
264 levels were only slightly higher in *LpWF*-pre-colonized flies (Fig. S5F). Thus, the presence of  
265 *LpWF* ameliorates the initial decrease in *Ai* levels, which could stem from a decrease in the  
266 growth rate, an increase in the death rate or the egestion rate, or some combination of these  
267 factors. We comprehensively measured each of these rates.

268 We measured growth rate in the fly using fluorescent protein plasmid dilution due to  
269 growth in the absence of antibiotic selection (Fig. S5B-H) (17). The mean generation time of *Ai*  
270 was similar in initially germ-free and *LpWF*-pre-colonized flies (0.21 vs. 0.23 h<sup>-1</sup>, Welch's t-test,  
271  $p=0.75$ ; Fig. 5B). However, the variance in plasmid loss was significantly higher in germ-free  
272 flies compared with *LpWF*-pre-colonized flies (F-test,  $p=0.014$ ), consistent with the observed  
273 population bottleneck (Fig. S5F), which we also previously observed in certain *Lp* strains and  
274 connected to a population bottleneck shortly after inoculation (17). Thus, different growth rates  
275 of *Ai* cells with or without *LpWF* do not seem to account for the differences in *Ai* abundance.

276 To determine whether the initially germ-free flies egested *Ai* cells more rapidly than  
277 *LpWF*-pre-colonized flies, we measured the egestion rate from the abundance of *Ai* in their frass  
278 (excrement) after 1 h in a fresh vial. The rate of viable *Ai* egested by initially germ-free flies  
279 reached zero by 1 dpi, while *Ai* egestion in *LpWF*-pre-colonized flies remained higher and never  
280 reached zero (Fig. S8). Differences in egestion rate could be due to more rapid passage through

281 the fly or to variable death rates of the bacteria inside the fly. To measure rates of passage  
282 through the fly, we fed fluorescent polystyrene beads simultaneously with *Ai* inoculation, and the  
283 proportion of egested beads was quantified over time by flow cytometry (Fig. S5J). The rate of  
284 bead egestion was highly similar between *LpWF*-pre-colonized and germ-free flies (Fig. S5J).  
285 Thus, transit time through the gut does not explain the differences in *Ai* colonization dynamics,  
286 suggesting a higher death rate of the *Ai* cells colonizing an initially germ-free gut.

287         Since egestion is tightly linked to ingestion (43), we measured the total *Ai* consumed by  
288 flies versus that remaining in the vial after feeding by counting CFUs in flies and on the food 1  
289 hpi, reasoning that any bacteria not accounted for must have died during the 1 h of feeding (Fig.  
290 S5, S9), e.g. by lysis in the digestive tract. In both sets of flies, only a small fraction of the  
291 inoculum was left 1 hpi (Fig. S1 ,S9). These measurements indicate that germ-free and *LpWF*-  
292 pre-colonized flies consumed the same amount of *Ai* and that *Ai* has a higher survival rate in the  
293 gut of *LpWF*-colonized flies.

294         The higher survival in co-colonized guts could be due to bacterial interspecies  
295 interactions, such as a cytoprotective effect of *LpWF* on *Ai*, or to host-microbe interactions, such  
296 as the fly gut becoming more hospitable to *Ai* when pre-colonized by *LpWF*. To differentiate  
297 between these two possibilities, we fed germ-free flies with *LpWF* and *Ai* simultaneously,  
298 reasoning that host priming would not be evident with simultaneous colonization (Fig. S5L,M).  
299 *Ai* abundance at 1 hpi in co-inoculated flies was similar to initially germ-free flies fed *Ai* alone,  
300 and significantly lower than in *LpWF*-pre-colonized flies 1 hpi (Fig. S5M), indicating that *LpWF*  
301 remodels the host in a manner beneficial to *Ai*. We also measured *Ai* survival 1 hpi when  
302 colonizing *Ai*-pre-colonized flies. A slight advantage was observed (Fig. S5L), which was  
303 substantially less than for *Ai* colonizing *LpWF* flies (c.f. Fig. 3A). *In vitro*, *Ai* abundance was

304 unaffected by co-culturing with *LpWF* (44). Because the *Ai* cells are alive in the proventriculus  
305 but dead upon defecation, a simple explanation consistent with our data is that for *Ai* cells  
306 colonizing *LpWF*-pre-colonized flies, more *Ai* cells are retained for a longer period of time in the  
307 proventriculus, and cells that are not retained in the proventriculus die when passing through the  
308 midgut. Taken together, our results indicate that the host environment is more permissive to *Ai*  
309 survival when pre-colonized by *LpWF*.

310

311

312

313

314

315

316

317

318

319

320

321

322

323 **Supplementary Figures (S1 through S9) follow:**

## FIGURE S1

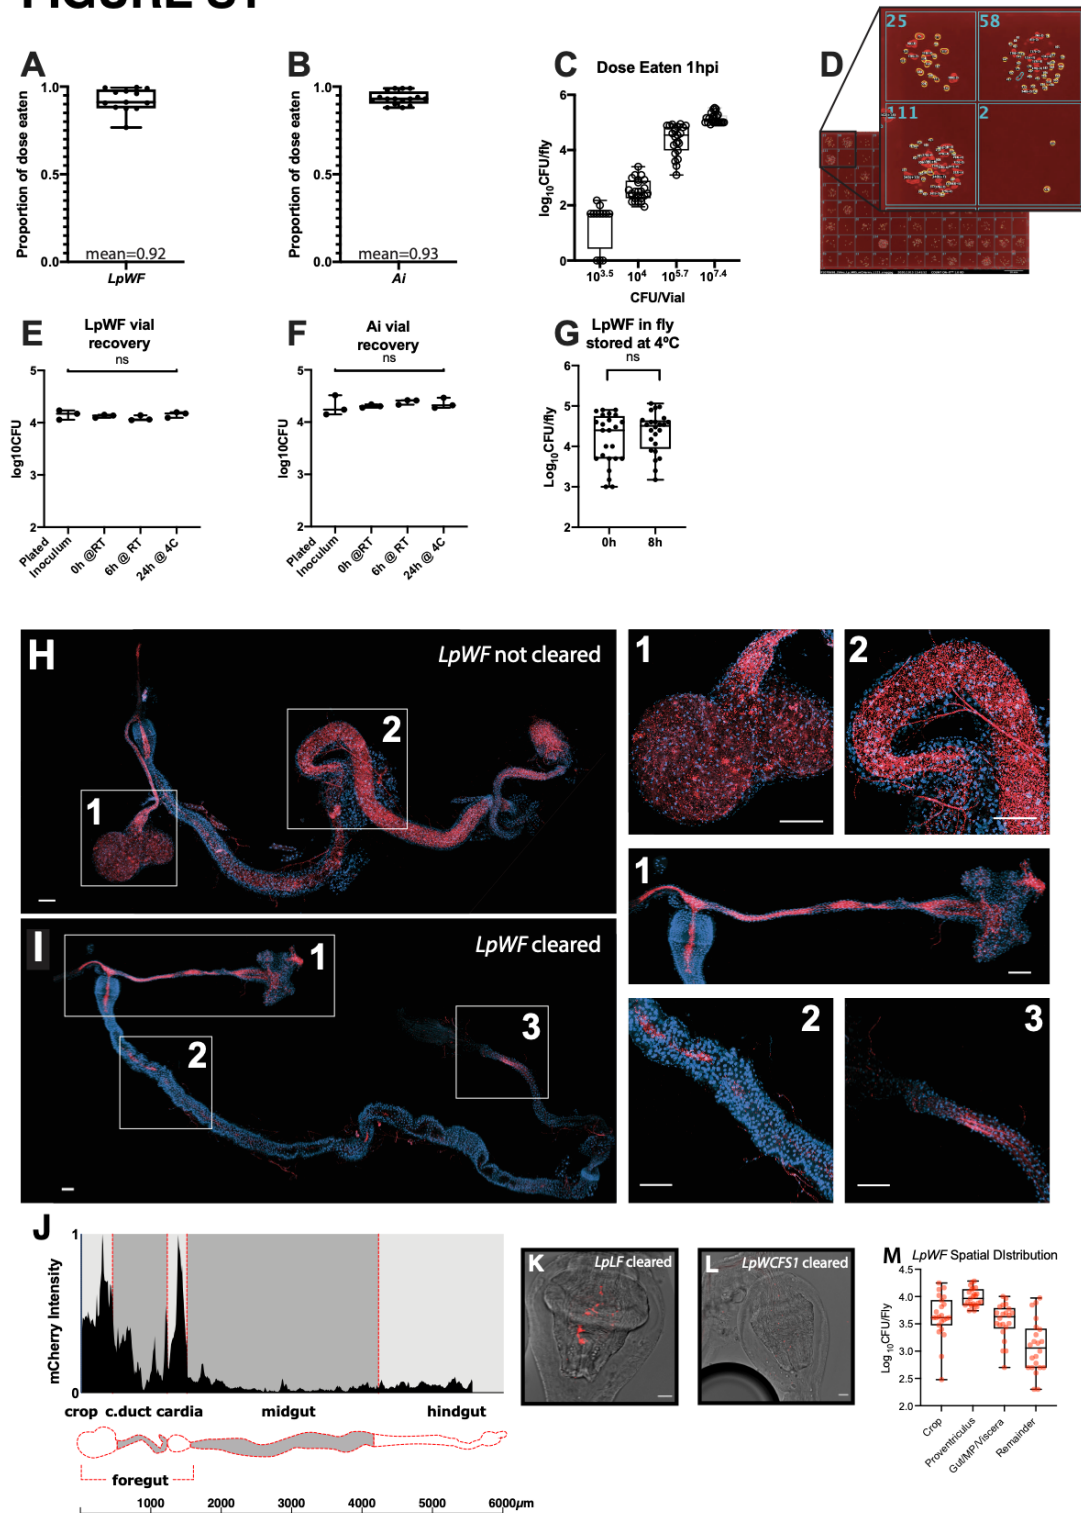

324

325 **Figure S1. Validation of colonization assay and culturing techniques.**

326

327

A. *LpWF* dose consumed was assayed by washing the food in 1x PBS and plating the solution. A dose of  $10^{3.5}$ ,  $10^4$ , or  $10^{5.7}$ ,  $10^{7.4}$  CFUs/vial was fed on top of agar food in

- 328 standard vials. Flies ate >90% of the dose after 1 hour (n=12 vials, mean=0.9235).  
329 Results were normalized to the dose. The proportion of the dose consumed was  
330 calculated by subtracting the leftover inoculum from the delivered inoculum and  
331 normalizing to the delivered inoculum. The growth of bacteria on the food over the 1  
332 hour feeding window was monitored by using a parallel control vial that did not have  
333 flies added (see panel E).
- 334 B. *Ai* dose eaten: flies ate >90% of dose after 1 hours (n=16 vials, mean=0.93). Same  
335 methods as panel A.
- 336 C. CFU abundance in flies 1 hpi. Flies were inoculated by feeding on standard food, 25  
337 flies/vial. For doses  $10^{3.5}$ ,  $10^4$ ,  $10^{5.7}$ , and  $10^{7.4}$  CFUs/vial (equal to  $10^{2.1}$ ,  $10^{2.6}$ ,  $10^{4.2}$ ,  
338 and  $10^6$  CFUs/fly respectively), flies all ate a similar amount of bacteria. For the lowest  
339 dose,  $10^{3.5}$  CFUs total in the vial, which was about 125 CFU/fly, 3 of 12 flies sampled  
340 had 0 detectable CFUs 1 hpi. The limit of detection was 50 CFUs.
- 341 D. For CFU quantification, flies were collected into 96 well plates containing 100 $\mu$ l PBS  
342 and 0.1 $\mu$ m glass beads. In our standard assays, CFUs were quantified by spotting 2 $\mu$ l of  
343 the 100  $\mu$ L fly homogenate (in 96 well plates) onto growth media in rectangular tray  
344 plates so that each well of the 96 well plate was spotted. Microcolonies were grown for  
345 30 h at 30°C. Counting was performed by photographing plates, counting colonies in  
346 ImageJ, and manually validating. Because the maximum amount of homogenate plated  
347 is 1/50th of a fly, a count of 1 colony yields a value of 50 CFUs/fly; the *resolution* of  
348 this quantification system is 50 CFUs, which we also call the limit of detection (LOD).  
349 To distinguish the invading strain from the resident strain in the priority effects  
350 experiments, invading bacteria containing a resistance plasmid were used and plated on  
351 selective media, CFU quantification in GF control flies was done in parallel during the  
352 same experiment using also the same plasmid-containing inoculum and counted on the  
353 same selective media.
- 354 E. Validation experiment shows that the number of CFUs recovered did not vary  
355 significantly from the inoculum measured by directly plating. Bacteria were recovered  
356 from vials by rinsing with 2mL PBS then plating a dilution to count CFUs. Inoculum  
357 was recovered immediately after placing on the fly food, after leaving at room  
358 temperature for 6 hours, and storing at 4°C overnight. *LpWF* bacteria were used.
- 359 F. Validation of *Ai* recovery from vials was the same as in D, CFU counts were consistent  
360 for *Ai*.
- 361 G. When flies could not be homogenized and plated immediately, they were stored at 4°C  
362 for up to 8 h. To test for any possible effects on the bacterial abundance, flies from the  
363 same vial were homogenized either immediately or after storage for 8 h at 4°C (n=23  
364 flies/time point). There was no significant difference in CFU counts. (n=46, unpaired t-  
365 test p=0.2794)
- 366 H. Transient microbes are found throughout the gut in flies kept on the same food for more  
367 than 24 h. *LpWF* is labeled with mCherry (red). Note the distended crop (1) and food  
368 filled midgut (2), the punctate appearance of the mCherry indicates bacteria dispersed  
369 throughout the fly food. Blue is a single z-slice of DAPI stain to indicate the gut  
370 boundary.
- 371 I. Guts were cleared of transient microbes by placing on agar-water starvation media for 3  
372 hours. *LpWF* remains in the foregut (1), the esophageal tract is lined with a dense and  
373 continuous population of *LpWF*, whereas there is a patchy appearance in the crop.



- 374 mCherry signal is largely absent from the midgut aside from a few small patches (2),  
375 and it is absent from the hindgut, although some autofluorescence occurs (3).  
376 J. Quantification of spatial distribution of *LpWF* in the fly digestive tract. Mean intensity  
377 of mCherry fluorescent signal in *LpWF*-mCherry-colonized flies 3-5 dpi, n=5 guts.  
378 Drawing depicts a segmentation of an average gut oriented lengthwise beginning with  
379 the crop. Intensity along length was normalized to the standard length per region.  
380 K. Microscopy of *LpLF* in the proventriculus. Scale bar 20  $\mu\text{m}$ .  
381 L. *LpWCFSI* in the proventriculus. Scale bar 20  $\mu\text{m}$ .  
382 M. Raw CFU counts of spatial distribution of *LpWF* in dissected gut regions (Fig. 1G)  
383 shows the majority of CFUs in the fly gut are in the proventriculus and crop duct.  
384

## FIGURE S2

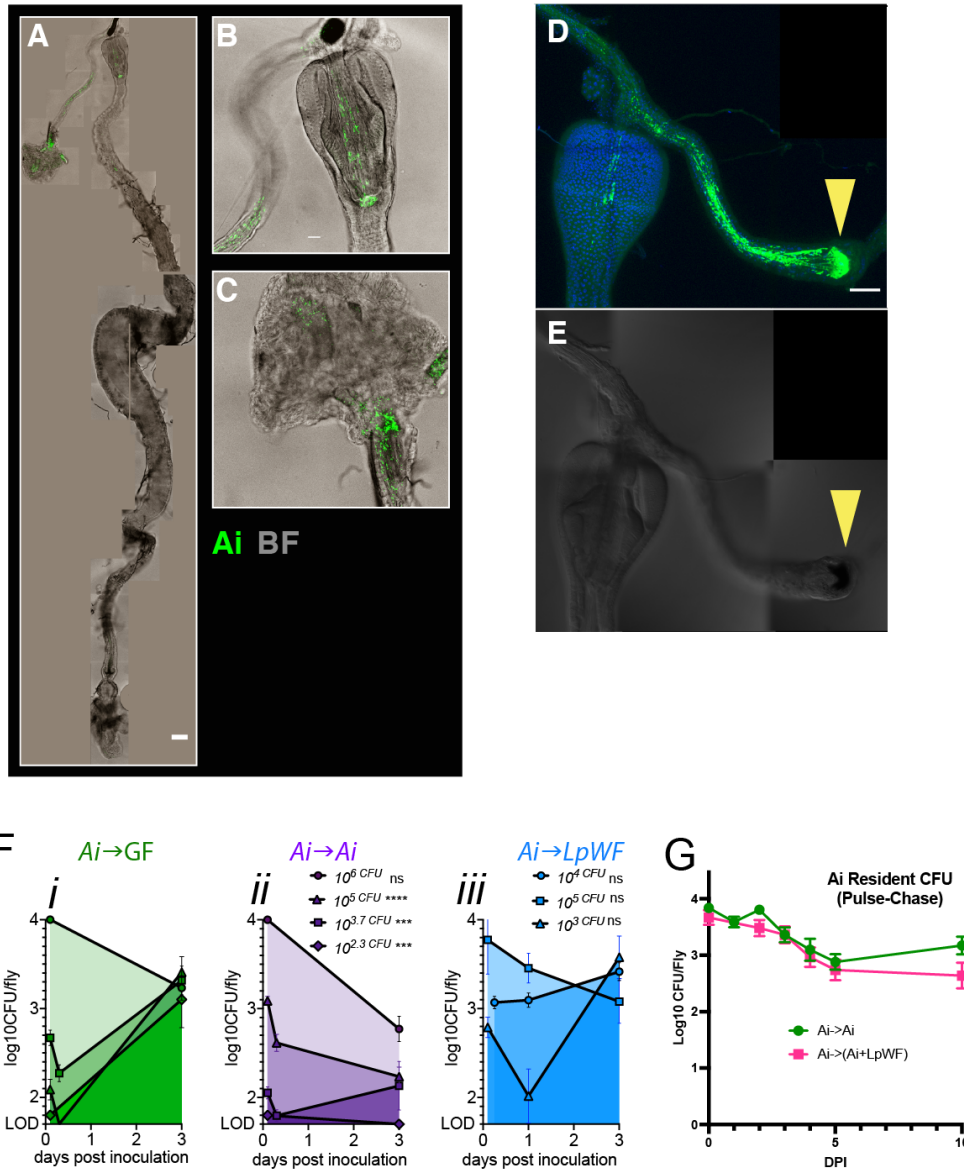

385 **Figure S2. *Ai* colonization is similar to *LpWF* colonization.**

- 386 A. Whole mount gut colonized by *Ai*-mGFP5.  
 387 B. Detail of proventriculus.  
 388 C. Detail of crop.  
 389 D. *Ai* colonization of the foregut after cropectomy surgery. Green = *Ai*-mGFP5. Blue =  
 390 DAPI. Scale bar 50  $\mu$ m. n=14 of 14 flies colonized after cropectomy surgery.  
 391 E. Brightfield image of the foregut in D. Yellow arrowhead indicates melanization at site of  
 392 crop duct severing.  
 393 F. Time course bacterial abundance for *Ai* colonizing (i) germ-free, (ii) *Ai*-colonized, and  
 394 (iii) *LpWF*-colonized flies. n=24 flies per time point.  
 395 G. Pulse-chase of *Ai* into *Ai*-mGFP5-pre-colonized flies (green) or flies pre-colonized by *Ai*-  
 396 mGFP5 and *LpWF* (pink).

## FIGURE S3

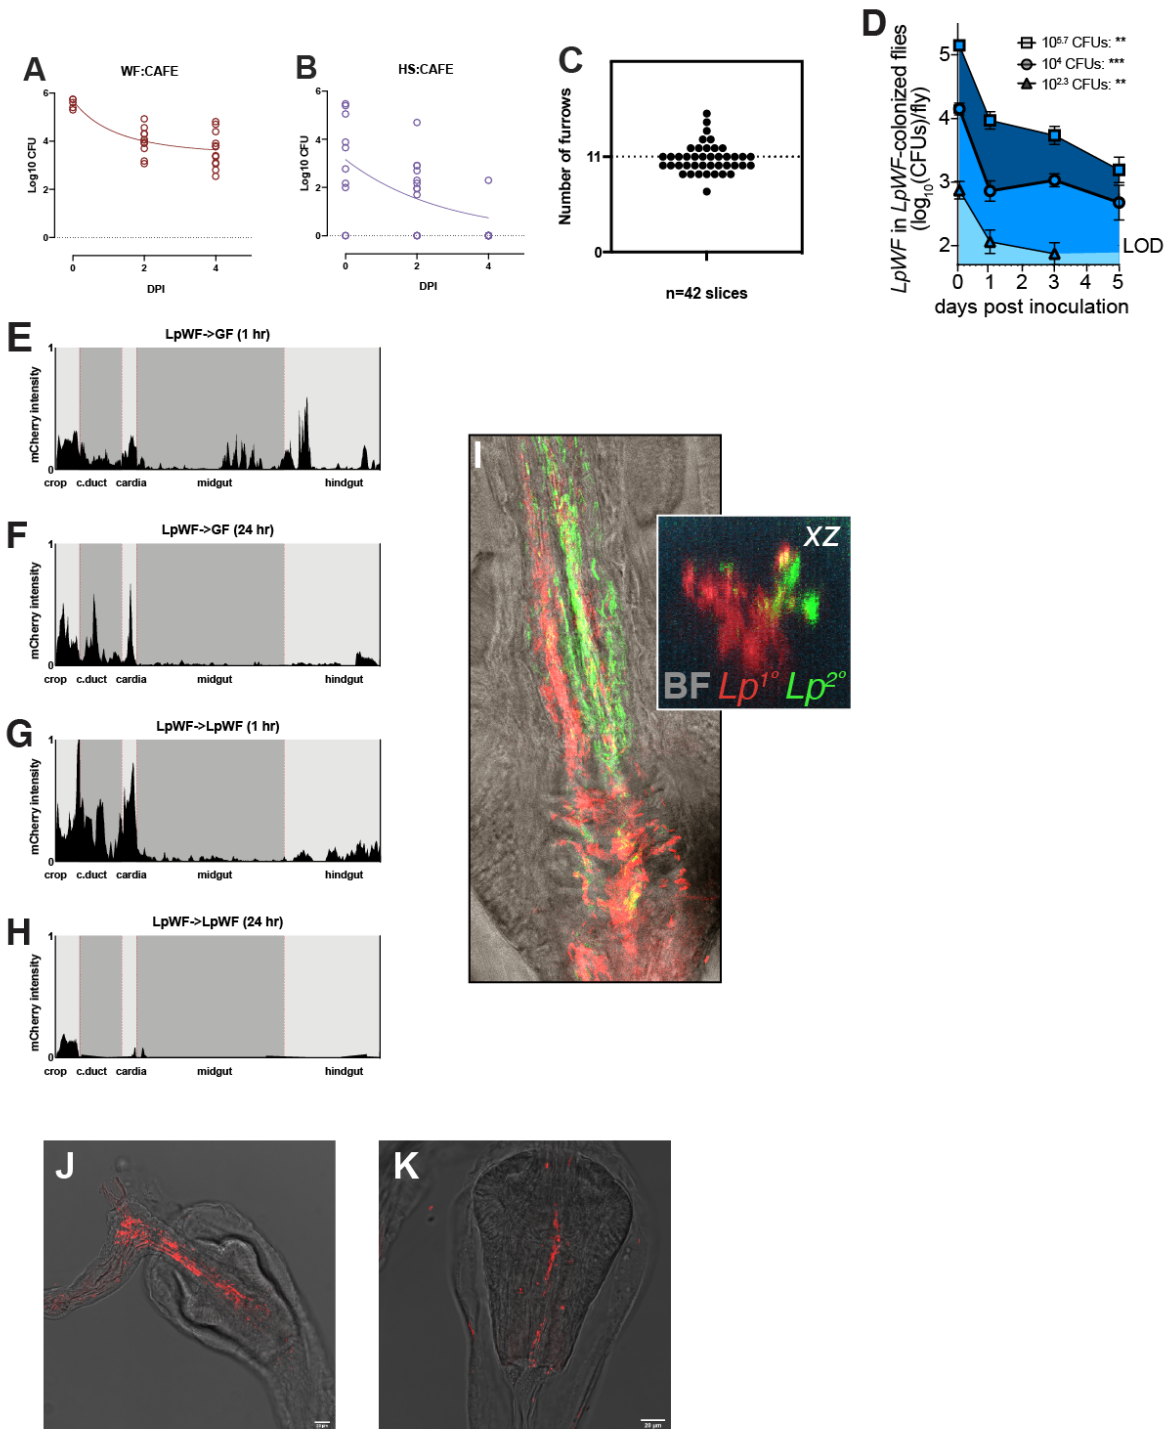

397

398 **Figure S3. Timecourses of microbe population abundance in the gut**  
399 Doses: *LpWF* Low:  $2.0 \times 10^3$  CFUs/fly; *LpWF* High:  $5.7 \times 10^5$  CFUs/fly. 12 flies were sampled  
400 daily and analyzed for CFU counts.

- 401 A. *LpWF* High into GF flies transferred daily to a fresh vial with only CAFÉ-supplied liquid  
402 food (10% glucose, 5% yeast extract, 0.42% propionic acid) over 5 dpi.
- 403 B. *LpWCFSI* High into GF flies transferred daily to fresh vial with only CAFÉ-supplied  
404 liquid food (10% glucose, 5% yeast extract, 0.42% propionic acid) over 5 dpi.
- 405 C. The number of furrows in the proventriculus, mean=10.89. Furrows were counted in 42  
406 TEM images from various points along the length of the proventriculus. n=5 different  
407 proventriculi.
- 408 D. A single dose of *LpWF*-mCherry was fed at a range of doses (see inset) to flies pre-  
409 colonized by *LpWF* and *LpWF*-mCherry CFUs were quantified over 5 d, indicating the  
410 abundance does not converge at  $\sim 10^4$  CFUs/fly as when the doses are fed to initially  
411 germ-free flies (Fig. 2A).
- 412 E. (E-H) Quantification of spatial distribution of *LpWF* along the gut. Mean intensity of  
413 *LpWF*-mCherry fluorescence fed to either GF or *LpWF* pre-colonized flies at 1 hour or 24  
414 hours after inoculation. Summed intensity projections of 80- $\mu$ m thick stacks of confocal  
415 images of whole gut dissections were quantified for fluorescence intensity, normalized to  
416 total intensity and length. N=5 flies per treatment. E: *LpWF*-mCherry  $\rightarrow$  GF at 1 hpi.
- 417 F. *LpWF*-mCherry  $\rightarrow$  GF at 24 hpi.
- 418 G. *LpWF*-mCherry  $\rightarrow$  *LpWF* at 1 hpi.
- 419 H. *LpWF*-mCherry  $\rightarrow$  *LpWF* at 24 hpi.
- 420 I. *LpWF*-sfGFP  $\rightarrow$  *LpWF*-mCherry 1 hpi of *LpWF*-sfGFP. Confocal fluorescent image of  
421 proventriculus. Inset: optical x-z cross section. Note that we rarely observed the  
422 secondary colonizer in the furrows, but when we did, the cells of the secondary dose  
423 clustered tightly.
- 424

## FIGURE S4

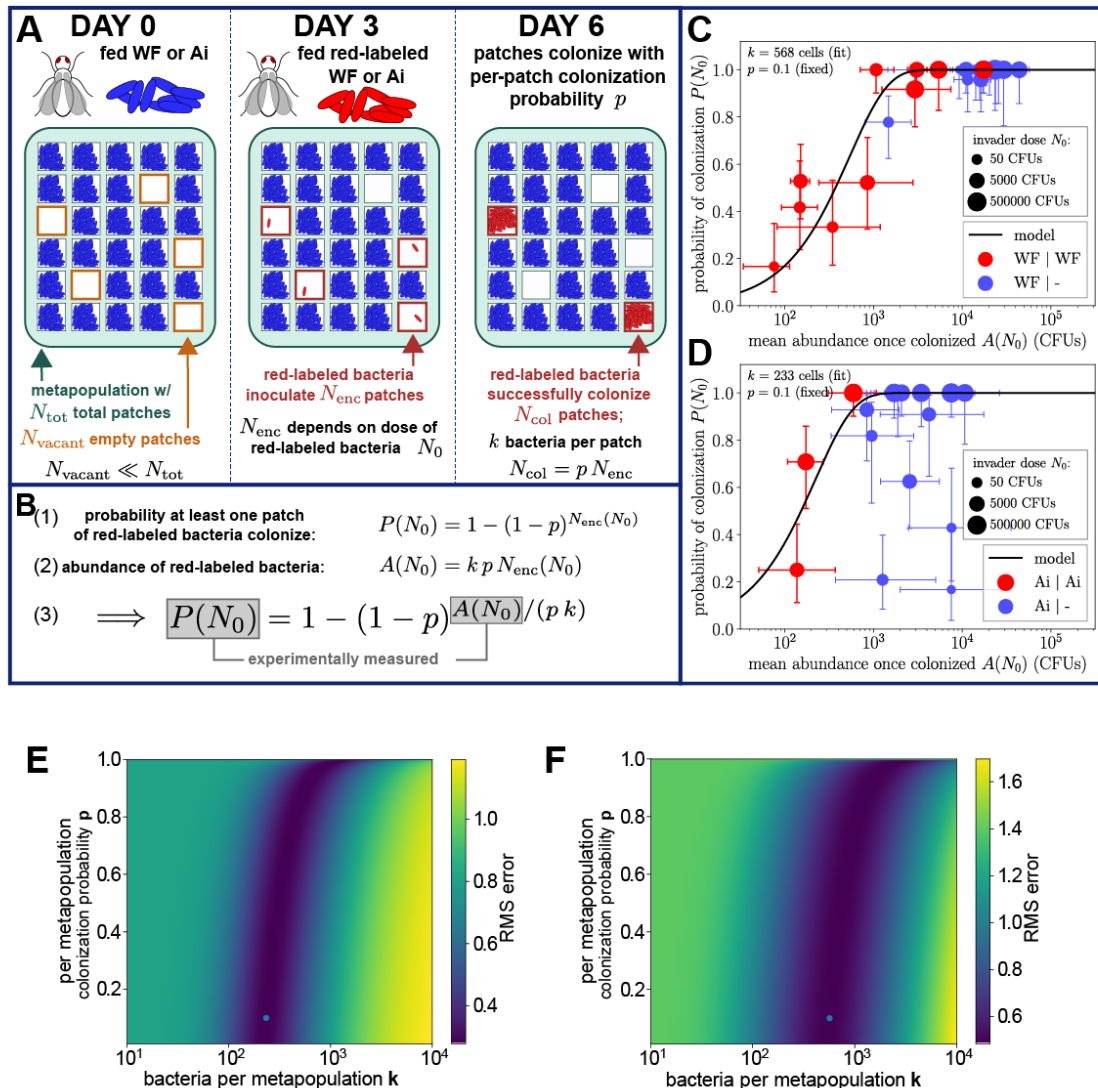

425

426 **Figure S4. Quantitative model of colonization relates final colonized abundance of invader**  
 427 **to the probability of colonization at the single fly level.**

428 A. Model describes the spatial variability of bacterial colonization with a metapopulation  
 429 model of patchy colonization, assuming that the fly gut may be subdivided into  $N_{tot}$   
 430 subpopulations based on the observation that turnover occurs on the time scale of 15 d.  
 431 On day 0 a strong colonizer (*LpWF* or *Ai*, colored blue) is fed to the fly. By day 3, the  
 432 initially fed blue bacterial species are assumed to colonize the majority of the patches,  
 433 leaving  $N_{vacant}$  patches uncolonized. When colonized, each patch has a carrying capacity  
 434 of  $k$  bacteria. On day 3 a red-labeled but otherwise identical bacteria (*LpWF* or *Ai*,  
 435 colored red) is fed to the fly at an abundance  $N_0$ , and the red-labeled bacteria proceed to  
 436 inoculate some  $N_{enc}$  of these patches; with probability  $p$  these inoculated patches become  
 437 fully colonized with  $k$  bacteria, and with probability  $1 - p$  they go extinct by day 6.

- 438 B. Equation describing the model. (1) The probability of invader colonization as a function  
439 of the dose. (2) Abundance ( $A$ ) of invader in terms of the per-patch carrying capacity  $k$ ,  
440 the per-patch probability of colonization  $p$ , and the number of inoculated patches  $N_{enc}$ .  
441 Eliminating  $N_{enc}$  yields the third equation. (3) Relationship between the experimentally  
442 measurable probability of colonization  $P_{col}$  and the invader abundance  $A$ . The two free  
443 parameters  $p$  and  $k$  may be fit; these parameters have the biological significance of  
444 indicating how bacteria are distributed among patches when colonizing, thus informing  
445 their spatial distribution.
- 446 C. Consistent with the model,  $LpWF \rightarrow LpWF$  priority effect experiments show a positive  
447 correlation between mean abundance  $A(N_0)$  and probability of colonization  $P(N_0)$ , and  
448 when fit to the metapopulation model with  $p = 0.1$  fixed predicts the per-patch carrying  
449 capacity  $k$  to be 568 cells
- 450 D.  $Ai \rightarrow Ai$  priority effect experiments predict a per-patch carrying capacity of 233 cells.  
451 Error bars show 95% confidence intervals (errors in probability of colonization computed  
452 with the Jeffreys interval; errors in mean abundance computed by bootstrapping log-  
453 transformed abundances).
- 454 E. Error probability function for the fit of  $k$  to the  $LpWF$  data shows that the fit of  $k$  is  
455 robust.
- 456 F. Error probability function for the fit of  $k$  to the  $Ai$  data shows that the fit of  $k$  is robust.  
457



## FIGURE S5

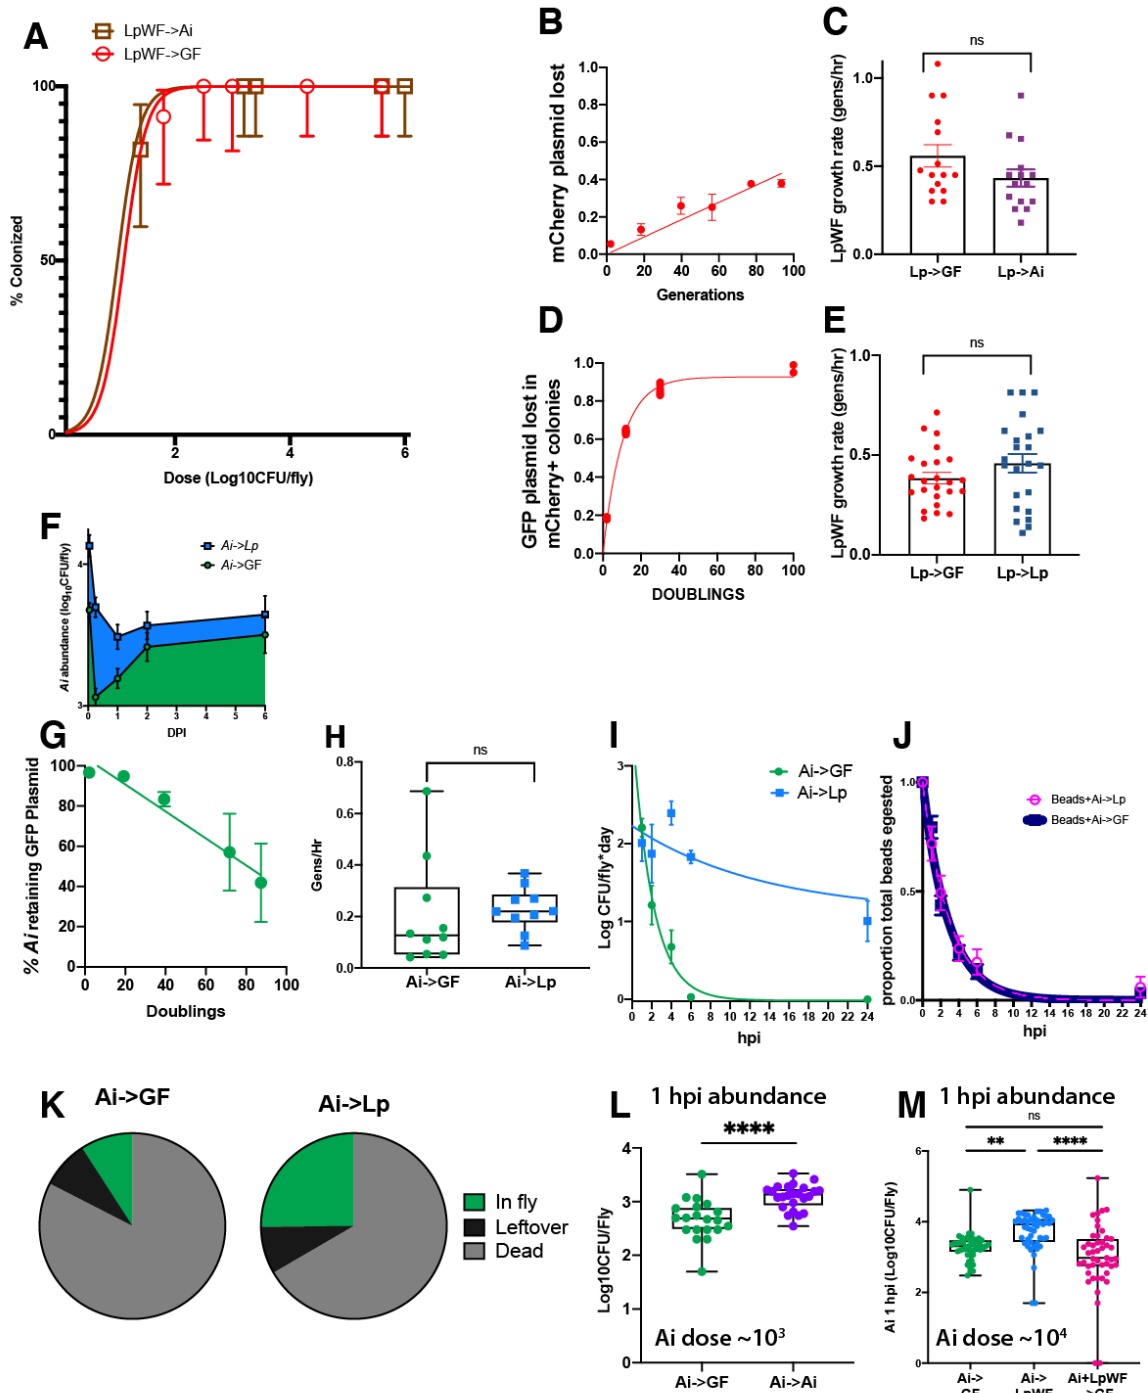

458 **Figure S5. Dose response and kinetics in vivo.**

459 A. Dose response for *LpWF* fed to *Ai*-pre-colonized flies.

460 B. Plasmid loss standard curve for pCD256NS-P1-mCherry- $\Delta$ Ec (mCherry-Cam) in *LpWF*  
461 enumerated daily for 5 d by plating on non-selective media and counting fluorescent vs.  
462 non-fluorescent colonies. 100-fold daily dilution in 3 mL culture. Slope of the simple

- 463 linear regression of *in vitro* plasmid loss rate was 0.004624 of total colonies per doubling  
464 event ( $R^2=0.07301$ ).
- 465 C. Growth rate of *LpWF* *in vivo*. *LpWF* invading GF flies had a mean growth rate 0.4589  
466 gen/hr 5 d after invasion while *LpWF* invading *Ai* flies grew at a lower but not  
467 significantly different mean of 0.3849 gen/hr (n=12 individual fly homogenates per  
468 condition; Welch's t-test,  $p=.1272$ ; F-test no significant difference in variances  
469  $p=0.3499$ ). The ~2-fold variation in individual fly measurements is expected due to a  
470 population bottleneck that we previously characterized (17).
- 471 D. Dual plasmid standard curve: plasmid loss in *LpWF* containing both plasmids  
472 pCD256NS-P11-mCherry- $\Delta$ Ec and pTRKH2-mGFP5 (GFP-Erm) was measured as a  
473 ratio of colonies positive for GFP-Erm plasmids (which are lost rapidly) divided by those  
474 positive for mCherry-Cam (which is retained much longer). This standard was modeled  
475 as an exponential function with a plateau:  $y = 1 - (0.9326 * \exp(-0.07325 * x))$ ,  $R^2=0.9986$ .
- 476 E. Growth rate of *LpWF* invading *LpWF* pre-colonized flies. *LpWFCam/Erm* invading GF  
477 flies had a mean growth rate 0.4589 gen/hr, whereas *LpWFCam/Erm* invading *LpWF* pre-  
478 colonized flies had a mean of 0.5596 gen/hr as estimated from CFUs in flies 5 dpi with  
479 *LpWFCam/Erm*. There was no significant difference in growth rates (Welch's t-test,  
480  $p=0.1768$ ). An F-test to compare variances was significant ( $p=0.034$ ) where *LpWF*  
481 invading *LpWF* pre-colonized flies had a higher variance in plasmid loss, suggesting a  
482 founder effect due to lower initial population.
- 483 F. *Ai* CFU abundance over time comparing flies germ-free at 0 dpi with flies pre-colonized  
484 by *LpWF* at 0 dpi. *Ai* abundance is lower in GF flies vs in flies pre- colonized by *LpWF* at  
485 1 hpi, 6 hpi, and 1 dpi ( $p<0.0001$ , independent, unpaired t-tests, Bonferroni correction)  
486 but not at 2 dpi or 5 dpi ( $p>0.05$ )
- 487 G. *Ai* plasmid loss standard curve: Growth in the absence of antibiotic selection leads to  
488 plasmid loss that is correlated with the number of cell divisions. The ratio of colonies  
489 with:without plasmid pCM62-mGFP5-tet (GFP-Tet) in *Acetobacter indonesiensis* SB003  
490 was quantified daily for 5 d by plating on non-selective media and counting fluorescent  
491 vs. non-fluorescent colonies as a function of the total amount of culture growth. The  
492 slope of the linear regression of this standard curve was 0.56% percent of cells lost their  
493 plasmid every doubling event. This rate was applied to plasmid loss by bacteria in flies to  
494 estimate the *in vivo* growth rate. Percentage of plasmid was measured daily for 5 d.  $Y =$   
495  $0.005579 * x$ , ( $R^2=0.1590$ )
- 496 H. Mean growth rate 6 d after inoculation was 0.2287 generations per hour (gen/hr) for *Ai*  
497 invading *LpWF* pre-colonized flies or 0.2060 gen/hr for *Ai* invading GF flies (n=10  
498 samples of 8 flies each). There was no significant difference in growth rates between *Ai*  
499 growth rate in flies (Unpaired Welch's t-test,  $p=0.7528$ ). Higher variance was observed  
500 for *Ai* invading GF flies (F-test,  $p=0.014$ ).
- 501 I. Transit time of *Ai* through the gut to GF or *LpWF*-pre-colonized flies in the first day after  
502 inoculation. *Ai* was fed along with polystyrene beads to flies (dose =  $1.2 \times 10^5$  CFUs of  
503 *Ai*/fly) in standard food in the cap of a 50 mL Falcon tube. *Ai* shedding was measured by  
504 counting CFUs recovered from falcon tubes by rinsing with PBS then centrifuging the  
505 contents to concentrate bacteria and beads for flow cytometry. Half-life of *Ai* in GF  
506 during the first day was 1.5 hours, while egestion of *Ai* in *LpWF* never decayed to zero.
- 507 J. Shedding of 0.5- $\mu$ m fluorescent, polystyrene beads co-fed to flies with *Ai* in FIG 5C.  
508 Beads were counted by flow cytometry. ( $\sim 4 \times 10^5$  beads fed per fly). Half-life of beads

- 509 was 1.9 or 2.0 hours in GF flies vs. in *LpWF* pre-colonized flies respectively, a non-  
510 significant difference (95% CI of decay fit).
- 511 K. Proportion of *Ai* dose remaining in vials after feeding, viable in flies, or killed, n=12 vials  
512 per condition. Proportions are normalized among 3 groups of flies fed doses of  $3.0 \times 10^3$ ,  
513  $3.0 \times 10^4$ , and  $3.2 \times 10^5$  CFU/fly.
- 514 L. Number of live CFUs of *Ai* in flies 1 hpi comparing *Ai* infor GF flies vs *Ai* into flies pre-  
515 colonized by *Ai*. Dose was  $\sim 10^4$  CFUs/fly. n=20 flies/condition.
- 516 M. Number of live CFUs of *Ai* in flies 1 hpi comparing *Ai* alone into GF flies versus *Ai* alone  
517 into *LpWF*-pre-colonized flies versus *Ai+LpWF* mixed into GF flies. Dose was  $3 \times 10^4$   
518 CFUs of *Ai*/fly (n=48 flies/condition). For *Ai+LpWF* mixed, dose of *LpWF* was  $3 \times 10^4$   
519 CFUs/fly.
- 520

521

## FIGURE S6

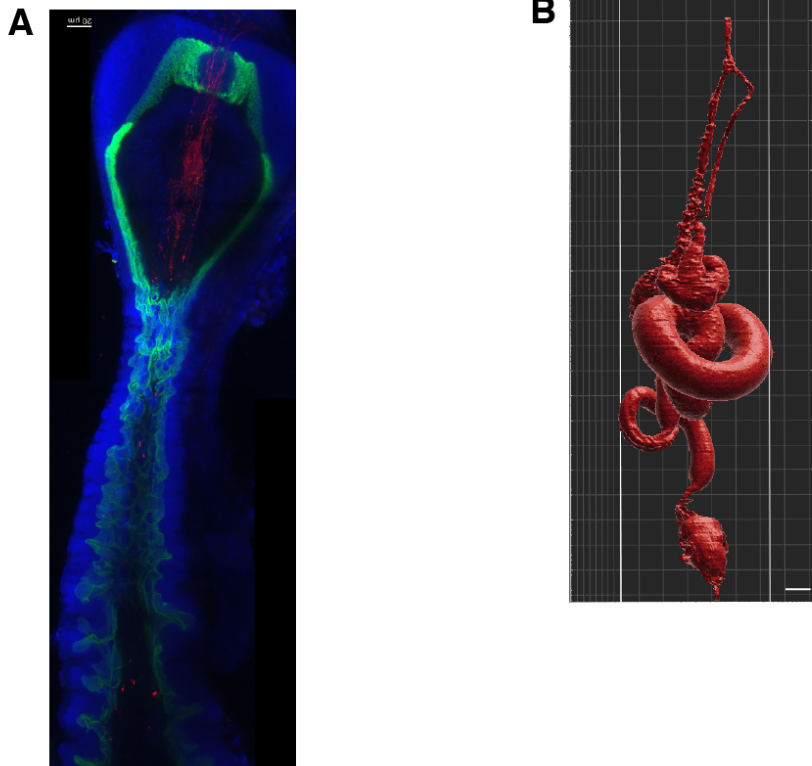

522

523

### 524 **Figure S6. Imaging crypt spaces.**

525 A. Foregut colonized by *LpWF-mCherry* in A142-GFP brush border reporter transgene flies  
526 provided by the Buchon Lab. Brush) borders (green), *LpWF-mCherry* (red), DNA/DAPI  
527 (blue). Scale bar = 20 μm.

528 B. Whole fly gut model made using XR-μCT, as in FIG 6A-C. Used to compute volume of  
529 the 3 segments assayed in FIG 1N. Segment volume: Foregut:  $5.08 \times 10^6 \mu\text{m}^3$ , Midgut:  
530  $4.60 \times 10^7 \mu\text{m}^3$ , Hindgut:  $6.45 \times 10^6 \mu\text{m}^3$ , Cardia:  $3.39 \times 10^5 \mu\text{m}^3$ , Crop:  $4.75 \times 10^6 \mu\text{m}^3$ ,  
531 Visera:  $5.24 \times 10^7 \mu\text{m}^3$ . Rough surfaces in the volume rendering correspond to crypts that  
532 are visualized by the brush border marker in A.

533

## FIGURE S7

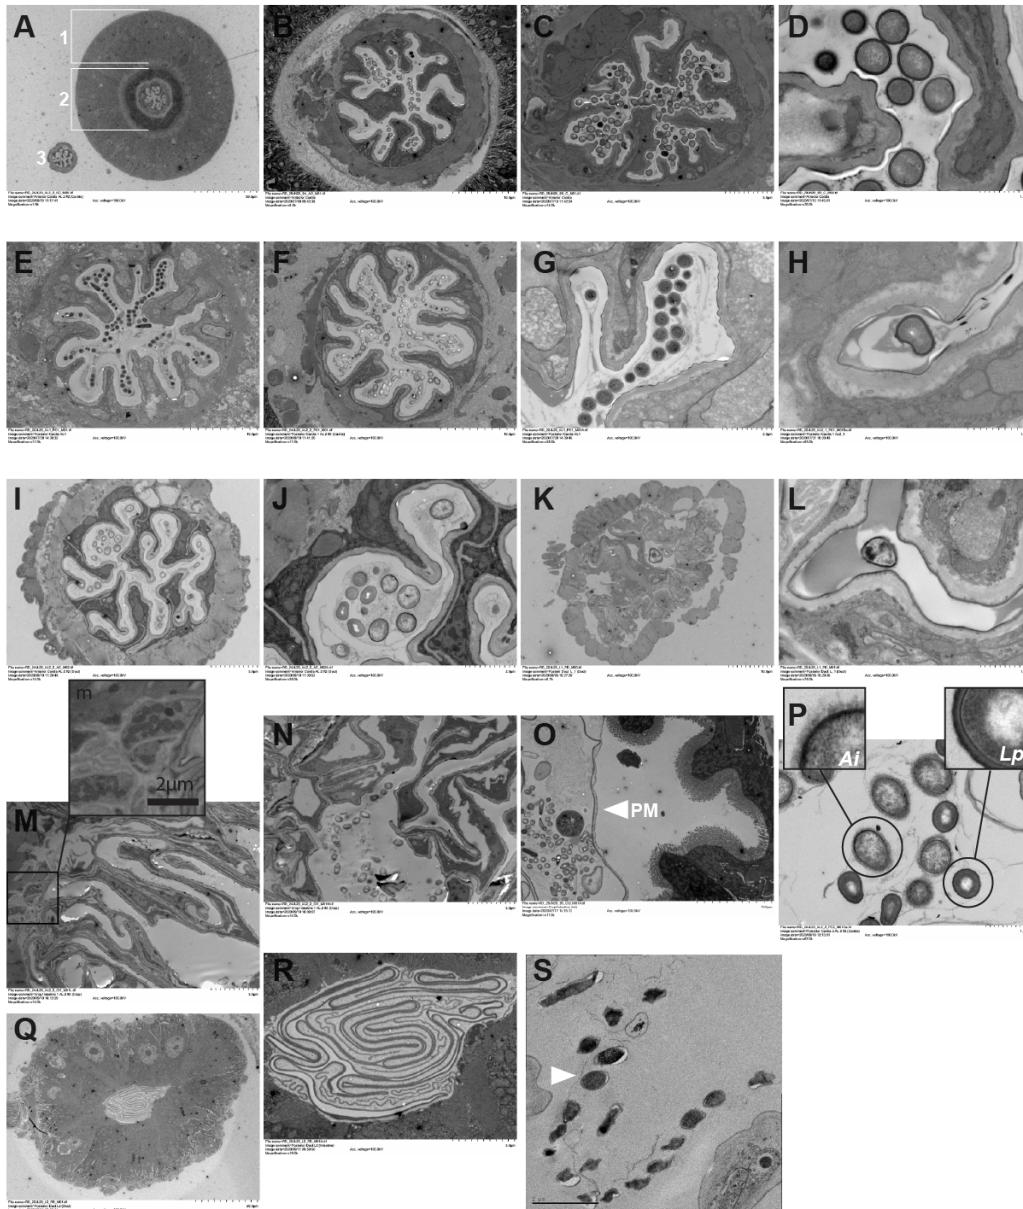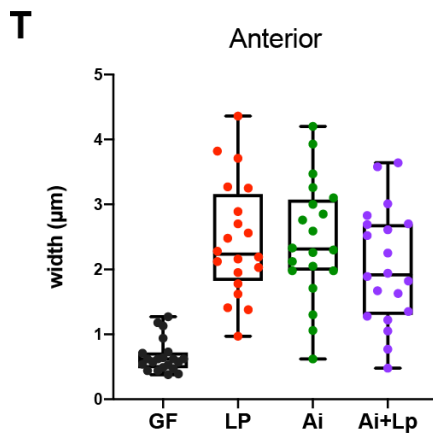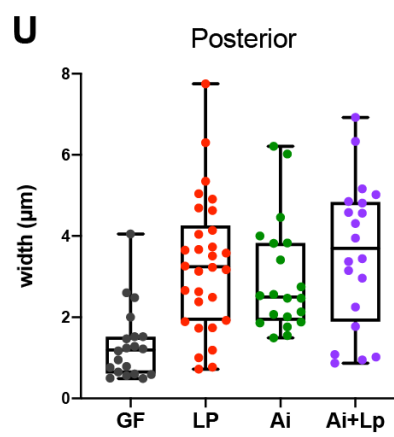



535  
536  
537  
538  
539  
540  
541  
542  
543  
544  
545  
546  
547  
548  
549  
550  
551  
552  
553  
554  
555  
556  
557  
558  
559  
560  
561  
562  
563  
564  
565  
566  
567  
568  
569  
570  
571  
  
572  
573

**Figure S7. Spatial Structure of Colonization by Transmission Electron Microscopy**

- A. Overview of the anterior proventriculus. The mesodermal, midgut portion of the proventriculus (the proventriculus or outer proventriculus) is indicated (1). The ectodermal, foregut portion (the inner proventriculus or stomadeal valve) is indicated (2). The crop duct is present in this section as well (3). (*Ai+LpWF* colonized)
- B. Anterior proventriculus post feeding (*LpWF* 1 hpi)
- C. Anterior proventriculus post feeding (*LpWF* 1 hpi)
- D. *LpWF* packed in anterior proventriculus furrow (*LpWF* 1 hpi)
- E. Posterior proventriculus colonized (*Ai->LpWF* 1 hpi)
- F. Posterior proventriculus colonized (*Ai+LpWF* 5 dpi)
- G. Posterior proventriculus furrow, (*Ai->LpWF* 1 hpi). Only *LpWF* visible.
- H. Long narrow furrow with single *Lp* cell (*Ai+LpWF* colonized)
- I. Crop Duct, similar morphology to proventriculus. (*Ai+LpWF* colonized)
- J. Detail of crop duct in I (*Ai+LpWF* colonized)
- K. Posterior crop duct/anterior crop, sparsely colonized (*LpWF* colonized)
- L. Single bacterium in posterior crop duct (*LpWF* colonized)
- M. Crop wall cuticle. Inset: cluster of bacteria. (*Ai+LpWF* Colonized)
- N. Crop lumen and cuticle (*Ai+LpWF* Colonized).
- O. Midgut, bacteria are separated from the brush borders (BB) by the peritrophic membrane (PM) (*LpWF* 1 hpi).
- P. Posterior proventriculus: both *Ai* and *LpWF* in the lumen of the posterior proventriculus. The gram negative *Ai* can be identified by a fuzzy coat (the glycocalyx or fimbriae) and its larger size relative to *LpWF*. *LpWF* is gram positive, it is distinguished by its thick cell wall. (*Ai+LpWF* colonized)
- Q. Constriction between posterior proventriculus and anterior midgut, where the peritrophic matrix (PM) is extruded from proventriculus outer lumen (*LpWF* colonized).
- R. PM immediately posterior to the proventriculus (*LpWF* colonized).
- S. High pressure freezing shows cleared zone between the lumen wall and bacteria, indicating the boundary region shown in FIG 6P-2 is not a fixation artefact.
- T. Quantification of proventriculus furrow width in the anterior proventriculus for germ-free flies and flies colonized with *LpWF*, *Ai*, or *Ai+LpWF*. n=2 proventriculi per treatment and 10 furrow measurements per proventriculus.
- U. Quantification of proventriculus furrow width in the posterior proventriculus for germ-free flies and flies colonized with *LpWF*, *Ai*, or *Ai+LpWF*. n=2 proventriculi per treatment and 10 furrow measurements per proventriculus.



## FIGURE S8

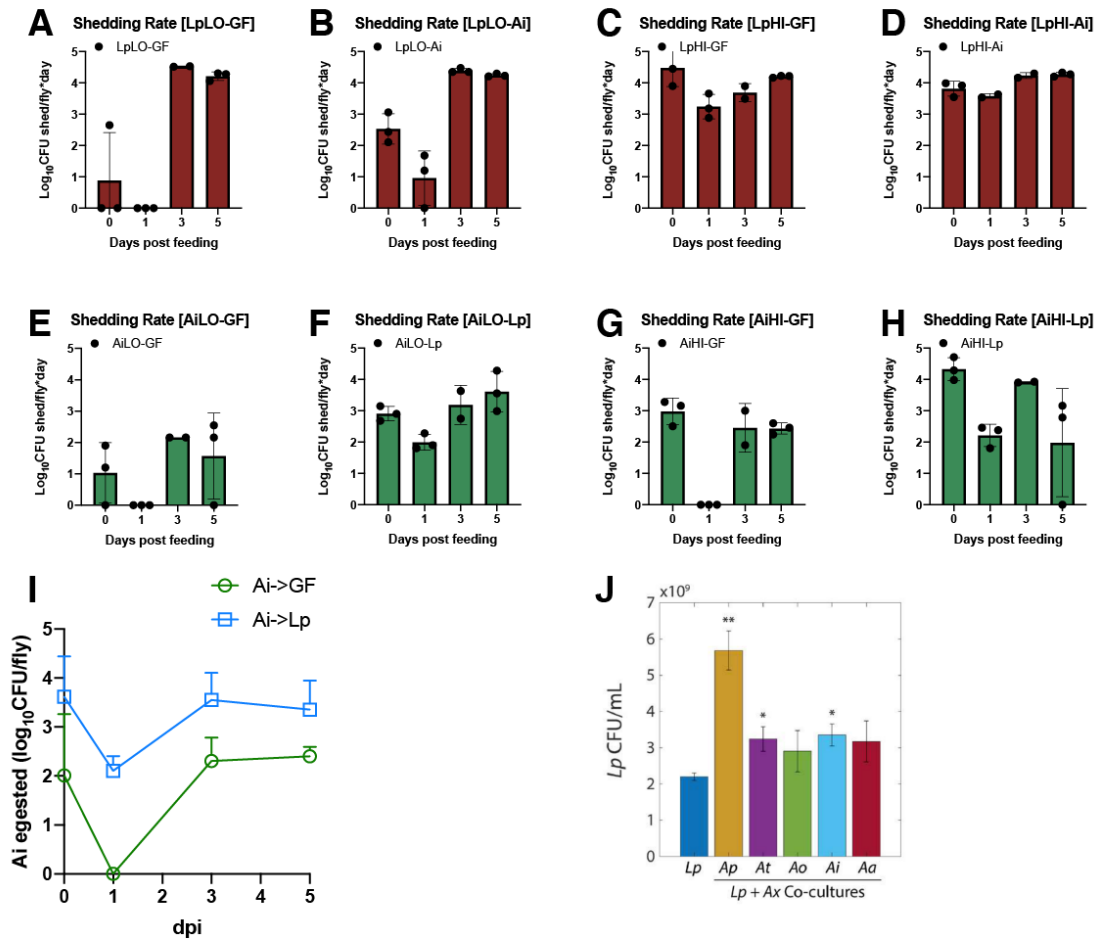

574

575

### Figure S8. Egestion of bacteria by flies following inoculation.

576 Shedding rates for various conditions following inoculation with bacteria were measured by  
 577 keeping flies in a vial for a period of 1 hour, recovering viable bacteria from the vial by rinsing  
 578 with PBS, then plating to count CFUs. Treatments correspond to the same experiments as in  
 579 figures S5A-S5H.

580 A. *LpWF* Low into GF flies.

581 B. *LpWF* Low into flies pre-colonized by *Ai*.

582 C. *LpWF* High into GF flies.

583 D. *LpWF* High into flies pre-colonized by *Ai*. (A-D) Regardless of dose, *LpWF* egestion rate  
 584 was lowest 1 dpi, suggesting a period of establishment. 3 dpi, *LpWF* CFUs are shed at a  
 585 consistent rate of  $2 \times 10^4$  CFU/fly/day, about equal to the stable population of *LpWF* (FIG  
 586 S5A).

587 E. *Ai* Low into GF flies.

588 F. *Ai* Low into flies pre-colonized by *LpWF*

589 G. *Ai* High into GF flies.

590 H. *Ai* High into flies pre-colonized by *LpWF*. (E-G) *Ai* shedding rate is variable over time  
 591 and between treatments.

592 I. Combined data from E-H plotted on same graph. After 24 hours, the average number of  
 593 *Ai* egested reaches 0 in GF flies then increases to a mean of  $2.5 \times 10^2$  CFU/fly/hour The

594 number of egested *Ai* in *LpWF*-pre-colonized flies is significantly higher at all time  
595 points, never drops to 0, and achieves an average rate of  $3.2 \times 10^3$  CFU/fly/day.  
596 J. Co-culturing *Lp* with *Ap*, *At*, *Ai*, or *Aa* resulted in increased *Lp* cell density after 48 h. Co-  
597 culturing with *Ao* did not significantly increase *Lp* cell density by 48 h. Error bars are  
598 standard deviation (S.D.) for each condition, n=3. P-values are from a Student's two-  
599 sided t-test of the difference from the monoculture (\*:  $P < 0.01$ , \*\*:  $P < 2 \times 10^{-3}$  ).  
600 (reproduced from (44))  
601  
602

603

## FIGURE S9

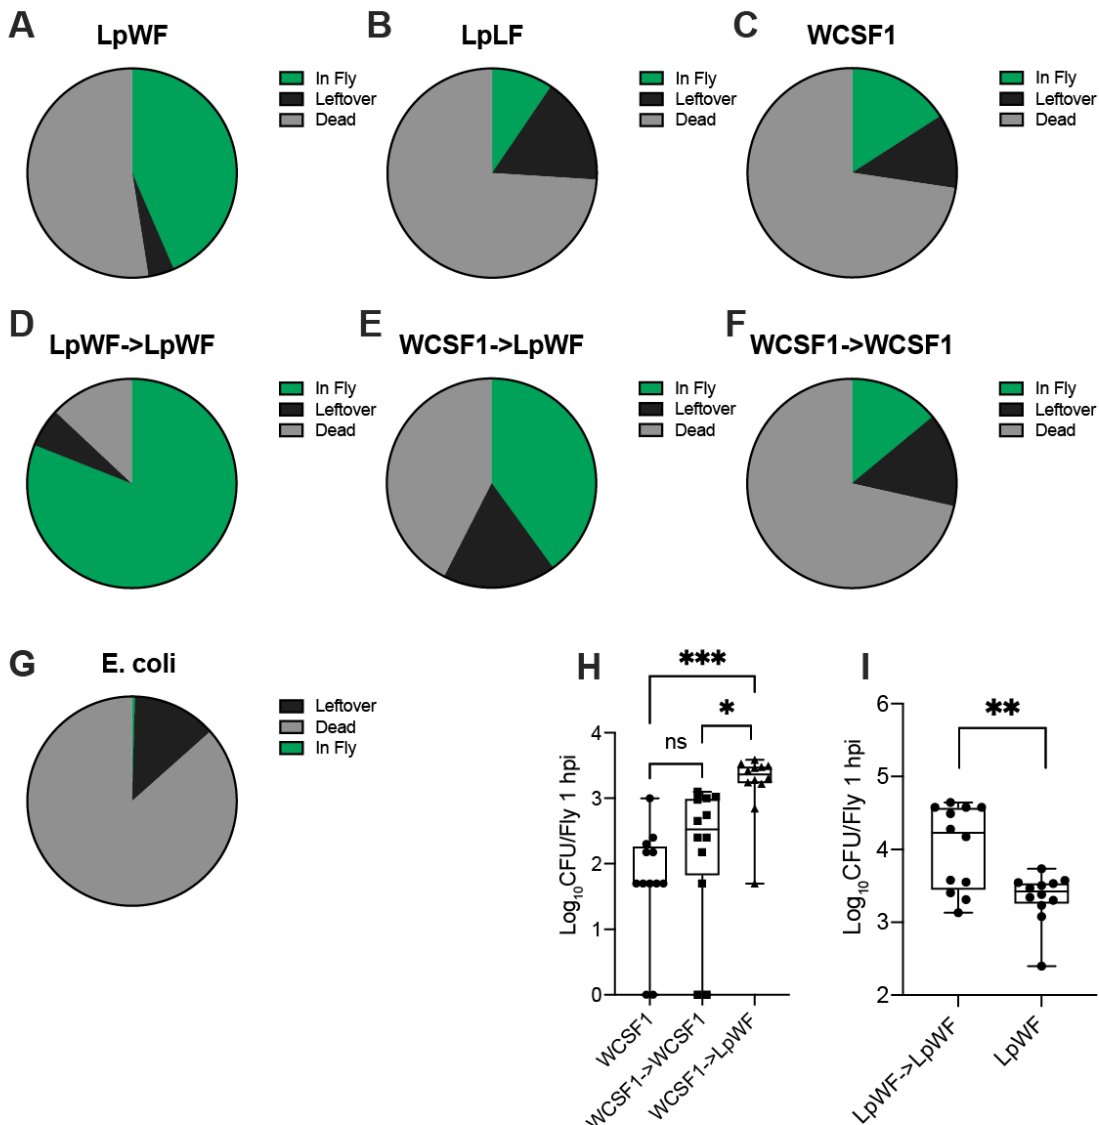

604

### 605 **Figure S9. Survival and death of *Lp* strains following inoculation**

606 A-F: The proportion of viable bacteria in the fly 1 hour post inoculation was measured alongside  
 607 the bacteria remaining in the vial (leftovers), these numbers were subtracted from initial dose  
 608 placed in the vial to estimate the number of bacteria killed. Proportions used for pie charts  
 609 were calculated on a per fly basis. Values for flies that were fed doses of  $\sim 10^5$  and  $\sim 10^7$  CFU/vial  
 610 were combined because we did not observe significant difference (n=24 flies/bacterial strain combined  
 611 from 2 vials of 12 flies/strain). The proportion of bacteria consumed (1 minus the leftover  
 612 fraction) varies between strains, indicating that *LpWF* is more readily consumed by flies. These  
 613 measurements were used to calculate the per-fly dose in the experiments and adjust the dose  
 614 accordingly. Limit of detection = 50 CFUs.

615 A. *LpWF* fed to germ-free flies.

616 B. *LpLF* fed to germ-free flies.

- 617 C. *WCSF1* (*LpHS*) fed to germ-free flies.  
618 D. *LpWF* fed to flies pre-colonized with *LpWF*.  
619 E. *WCSF1* fed to flies pre-colonized with *LpWF*.  
620 F. *WCSF1* fed to flies pre-colonized with *WCSF1*.  
621 G. *E. coli* JM110 fed to germ-free flies.  
622 H. CFU surviving in flies fed a dose of *WCSF1* ( $2 \times 10^5$  CFU/vial or  $1 \times 10^4$  CFU/fly, n=12  
623 flies). Survival of *WCSF1* after one hour was significantly higher in flies pre-colonized  
624 with *LpWF* ( $p=0.0006$ , one-way ANOVA). Survival of *WCSF1* in flies pre- colonized  
625 with *WCSF1* was not significantly higher. Survival of invading *LpWF* dose was better in  
626 flies pre-colonized with *LpWF* ( $4 \times 10^4$  CFU/vial or  $3 \times 10^3$  CFU/fly, n=12 flies).  
627  $p=0.0020$ , one-way ANOVA).  
628 I. CFU surviving in flies fed a dose of *LpWF*  $2 \times 10^5$  CFU/vial or  $1 \times 10^4$  CFU/fly, n=12  
629 flies). Survival of *LpWF* after one hour was significantly higher in flies pre-colonized  
630 with *LpWF* ( $p<0.01$ , two-sided t-test).

631

632

633

634

635

636

637

638

639 **Movie S1.**

640 3-d visualization of *LpWF* and *Ai* co-colonization in the posterior proventriculus shows sectored  
641 colonization of the two strains in their respective niches. Imaging methods are the same as for  
642 Fig. 3D.
